1 **Endothelial junctional membrane protrusions serve as hotspots for**  
2 **neutrophil transmigration.**

3

4 Janine J.G. Arts<sup>1,2</sup>, Eike K. Mahlandt<sup>2</sup>, Max L.B. Grönloh<sup>1,2</sup>, Lilian Schimmel<sup>1,6</sup>, Ivar Noordstra<sup>1,6</sup>,  
5 Abraham C.I. van Steen<sup>1</sup>, Simon Tol<sup>1</sup>, Jos van Rijssel<sup>1</sup>, Martijn A. Nolte<sup>1</sup>, Marten Postma<sup>2</sup>,  
6 Satya Khuon<sup>3</sup>, John M. Heddleston<sup>3,7</sup>, Eric Wait<sup>3</sup>, Teng-Leong Chew<sup>3</sup>, Mark Winter<sup>4</sup>, Eloi  
7 Montanez<sup>5</sup>, Joachim Goedhart<sup>2</sup>, Jaap D. van Buul<sup>1,2,\*</sup>

8

9 **Affiliations:**

10 <sup>1</sup>Molecular Cell Biology Lab at Dept. Molecular Hematology, Sanquin Research and Landsteiner Laboratory,  
11 Amsterdam, the Netherlands; <sup>2</sup>Leeuwenhoek Centre for Advanced Microscopy (LCAM), section Molecular Cytology  
12 at Swammerdam Institute for Life Sciences (SILS) at University of Amsterdam, Amsterdam, the Netherlands;  
13 <sup>3</sup>Advanced Imaging Center at Janelia Research Campus, Howard Hughes Medical Institute, Ashburn, VA, USA;  
14 <sup>4</sup>Zuckerman Postdoctoral Fellow, Department of Marine Sciences, University of Haifa, Israel; <sup>5</sup>Department of  
15 Physiological Sciences, Faculty of Medicine and Health Sciences, University of Barcelona, Barcelona, Spain.  
16 <sup>7</sup>Microscopy Facility at the Cleveland Clinic Florida Research and Innovation Center, Port St. Lucie, FL, USA

17

18 <sup>6</sup>Current address: Division of Cell and Developmental Biology, Institute for Molecular Bioscience, The  
19 University of Queensland, Brisbane, QLD, Australia

20

21 **\*Correspondence should be addressed to:**

22 Jaap D. van Buul  
23 Molecular Cell Biology Lab, Dept. Molecular and Cellular Hemostasis  
24 Sanquin Research and Landsteiner Laboratory  
25 Academic Medical Center at the University of Amsterdam  
26 Plesmanlaan 125, 1066CX Amsterdam, the Netherlands  
27 Phone: +31205121219  
28 E-mail: [j.vanbuul@sanquin.nl](mailto:j.vanbuul@sanquin.nl)

29

30 **Keywords:** Transmigration, Small GTPase, Rac1, endothelium, inflammation

31

1 **Abstract**

2 Upon inflammation, leukocytes rapidly transmigrate across the endothelium to enter the  
3 inflamed tissue. Evidence accumulates that leukocytes use preferred exit sites, though it is not  
4 yet clear how these hotspots in the endothelium are defined and how they are recognized by  
5 the leukocyte. Using lattice light sheet microscopy, we discovered that leukocytes prefer  
6 endothelial membrane protrusions at cell junctions for transmigration. Phenotypically, these  
7 junctional membrane protrusions are present in an asymmetric manner, meaning that one  
8 endothelial cell shows the protrusion and the adjacent one does not. Consequently, leukocytes  
9 cross the junction by migrating underneath the protruding endothelial cell. These protrusions  
10 depend on Rac1 activity and by using a photo-activatable Rac1 probe, we could artificially  
11 generate local exit-sites for leukocytes. Overall, we have discovered a new mechanism that  
12 uses local induced junctional membrane protrusions to facilitate/steer the leukocyte  
13 escape/exit from inflamed vessel walls.

14

15 **Words:** 142

16

## 1 INTRODUCTION

2 The current paradigm of leukocyte transendothelial migration (TEM) comprises  
3 leukocyte rolling, arrest, crawling, firm adhesion and diapedesis (Alon & van Buul, 2017;  
4 Butcher, 1991; Muller, 2016; Nourshargh & Alon, 2014; Springer, 1994; Vestweber, 2015) .  
5 The latter step occurs either through the endothelial junctions, known as the paracellular route  
6 or through the endothelial cell body, called the transcellular route (Carman, 2009; Wittchen,  
7 2009). Interestingly, some locations seem to favor the migration of multiple leukocytes that  
8 breach the endothelium in rapid succession (Abtin et al., 2014). Prior to exiting the circulation,  
9 leukocytes change their crawling morphology to a round appearance, indicating that at exit-  
10 sites differential and local regulation is required (Shulman et al., 2009). However, what  
11 determines where leukocytes take the exit remains elusive.

12 When leukocytes crawl on the endothelial monolayer, it seems they are looking for the  
13 perfect spot to leave the circulation. As if there would be a preferred “hotspot” for these  
14 leukocytes to cross the endothelium. So far, several key principles have been suggested that  
15 may define local endothelial exit-sites for leukocytes (Muller, 2015; Schimmel et al., 2017;  
16 Vestweber, 2015). First, leukocytes are attracted towards an optimal concentration of  
17 chemokines (*chemotaxis*), density of adhesion molecules (*haptotaxis*) or cellular stiffness  
18 (*durotaxis*). Recently, it has been shown that perivascular macrophages, lining pericytes  
19 located between the tissue and blood vessels, secrete chemokines that may cause local  
20 queues for neutrophil diapedesis *in vivo* (Abtin et al., 2014). Similar ideas have been suggested  
21 for *haptotaxis*: integrin ligands presented at the apical surface of the endothelium that regulate  
22 leukocyte behaviour (Shulman et al., 2009). For example, high surface levels of ICAM-1 induce  
23 a transition from paracellular to robust transcellular migration, while intermediate levels favor  
24 the paracellular route (Abadier et al., 2015; Yang et al., 2005), although the underlying  
25 mechanism is unclear. Data from our lab (Heemskerk et al., 2016; Timmerman et al., 2016;  
26 van Buul et al., 2007, 2010) and that of others (Adamson et al., 1999; Barreiro et al., 2002,  
27 2008; Carman & Springer, 2004; Lyck & Enzmann, 2015; Muller, 2015; Vestweber, 2015)  
28 indicate a dynamic role for the endothelial actin cytoskeleton in controlling the factors described  
29 above. Recently, Hyun and colleagues showed the existence of two different hotspots during  
30 extravasation *in vivo* (Hyun et al., 2019), one of which is located on the endothelium.

31 Perturbation of the endothelial actin cytoskeleton drastically influences the phenotype  
32 of the adherent leukocyte: blocking actin polymerization of the endothelium prevents the  
33 leukocyte to properly adhere and spread and consequently, leukocyte TEM is critically  
34 impaired (Barreiro et al., 2002; Carman et al., 2003; Carman & Springer, 2004; Schimmel et  
35 al., 2018; van Buul et al., 2010). On the other hand, once a leukocyte has adhered to the  
36 endothelium, F-actin is locally (i.e. underneath the adherent leukocyte) depolymerized (Isac et  
37 al., 2011) These findings suggest that the endothelium can orchestrate local leukocyte

1 diapedesis by remodeling its actin cytoskeleton at the subcellular level. Thus, understanding  
2 how actin-regulatory protein complexes orchestrate TEM under inflammation may thus be key  
3 to discover the mechanisms of the endothelium that drive local leukocyte exit.

4 Our observations underscore that leukocyte diapedesis is not a random event but  
5 occurs at predefined exit-sites. As TEM is a very rapid process (leukocytes cross the  
6 endothelium within 120 seconds), we used lattice light sheet microscopy, allowing high-speed  
7 imaging in 3 dimensions in time with high resolution but low toxicity to monitor TEM in detail.  
8 We discovered a novel mechanism how the endothelium generates local exit-sites for  
9 leukocytes to leave the vasculature. By asymmetrically inducing Rac1- and Arp3-dependent  
10 apical membrane protrusions at cell-cell junction regions that express ACKR1, ICAM-1 and  
11 PECAM-1, the endothelium guides leukocytes to the exit-side. Additionally, these protrusions  
12 are also found *in vivo*, and local activation of Rac1, using a photo-activatable Rac1 probe drives  
13 leukocyte exit on demand. Our work identified so-called endothelial junctional membrane  
14 protrusions (JMPs), a novel molecular mechanism that allows local steering of leukocyte TEM  
15 at the vascular level and offers new therapeutic targets to locally inhibit or enhance leukocyte  
16 extravasation.

17

18

## 1 RESULTS

### 2 Endothelial cells display junctional membrane protrusions

3 When neutrophils crawl on an endothelial surface under inflammatory conditions, they  
4 are searching for an exit-point. Although most of the neutrophils seems to transmigrate at the  
5 first junction, their migratory behavior is more complex, and consists of walks along a junction  
6 and turns after crossing a junction (Schenkel et al. 2004). Using transendothelial migration  
7 (TEM) under flow assays (Heemskerk et al. 2016), we observed that although most neutrophils  
8 transmigrated at the first cell-cell junction they encounter (Figure 1A), only half of them  
9 transmigrated immediately upon arrival to that junction (Figure 1B). The other half migrated  
10 laterally along this junction for at least 20 seconds before crossing. In fact, approximately 40%  
11 of these neutrophils changed direction upon diapedesis, meaning that once arrived at the cell-  
12 cell junction, these neutrophils migrated on top of that junction, turned around and exited by  
13 migrating underneath the endothelial cell that they previously crawled on (Figure 1C), in line  
14 with Schenkel and colleagues (Schenkel et al., 2004). The findings presented here confirm that  
15 under physiological flow conditions, most neutrophils search for specific sites on the  
16 endothelium to exit (Movie S1).

17 To study the morphology and dynamics of the endothelial cell membranes in full detail,  
18 we used lattice light sheet microscopy (LLSM). This technique allows for extremely fast imaging  
19 in 3D in time with high resolution and low phototoxicity (Chen et al., 2014). Membranes of  
20 human umbilical vein endothelial cells (HUVECs) were labeled with a fluorescently tagged  
21 membrane marker (mNeonGreen-CAAX). 3D Reconstructions revealed that the endothelium  
22 extended membrane protrusions apically into the lumen (Figure 1D and S1A). These  
23 protrusions showed a highly dynamic appearance and various morphological shapes, ranging  
24 from finger-like to flap-like structures (Movie S2). As these protrusions appeared at junction  
25 regions, we termed them junctional membrane protrusions (JMPs). To study if JMPs are  
26 evoked by inflammation, we developed a robust and unbiased algorithm that allowed us to  
27 follow JMPs in 3D in time and quantify JMP volume, dynamics, and area over time (Figure S1B  
28 and Movie S3-4). These data revealed that  $\text{TNF}\alpha$  treatment increased the overall volume of  
29 the JMPs as well as the dynamics of these JMPs, as well as the area of the JMP on the  
30 endothelium, although the latter one was not significant (Figure 1E-F and S1C-D).

31 The LLSM data provided highly detailed images of protrusion structures but is not  
32 suitable for large number of samples and testing of multiple experimental conditions.  
33 Therefore, to simplify the observation of JMP dynamics, we developed a method that enables  
34 the quantification of JMP dynamics with widefield microscopy imaging data of HUVECs with a  
35 fluorescent membrane marker. The rationale of the image analysis was that highly dynamic  
36 membranes will display larger fluctuations in fluorescence intensity as compared to static

1 membranes. Figure 1G shows an example of such a JMP dynamics in time map and showed  
 2 that JMPs colocalized with VE-cadherin (Figure 1H).

## Figure 1

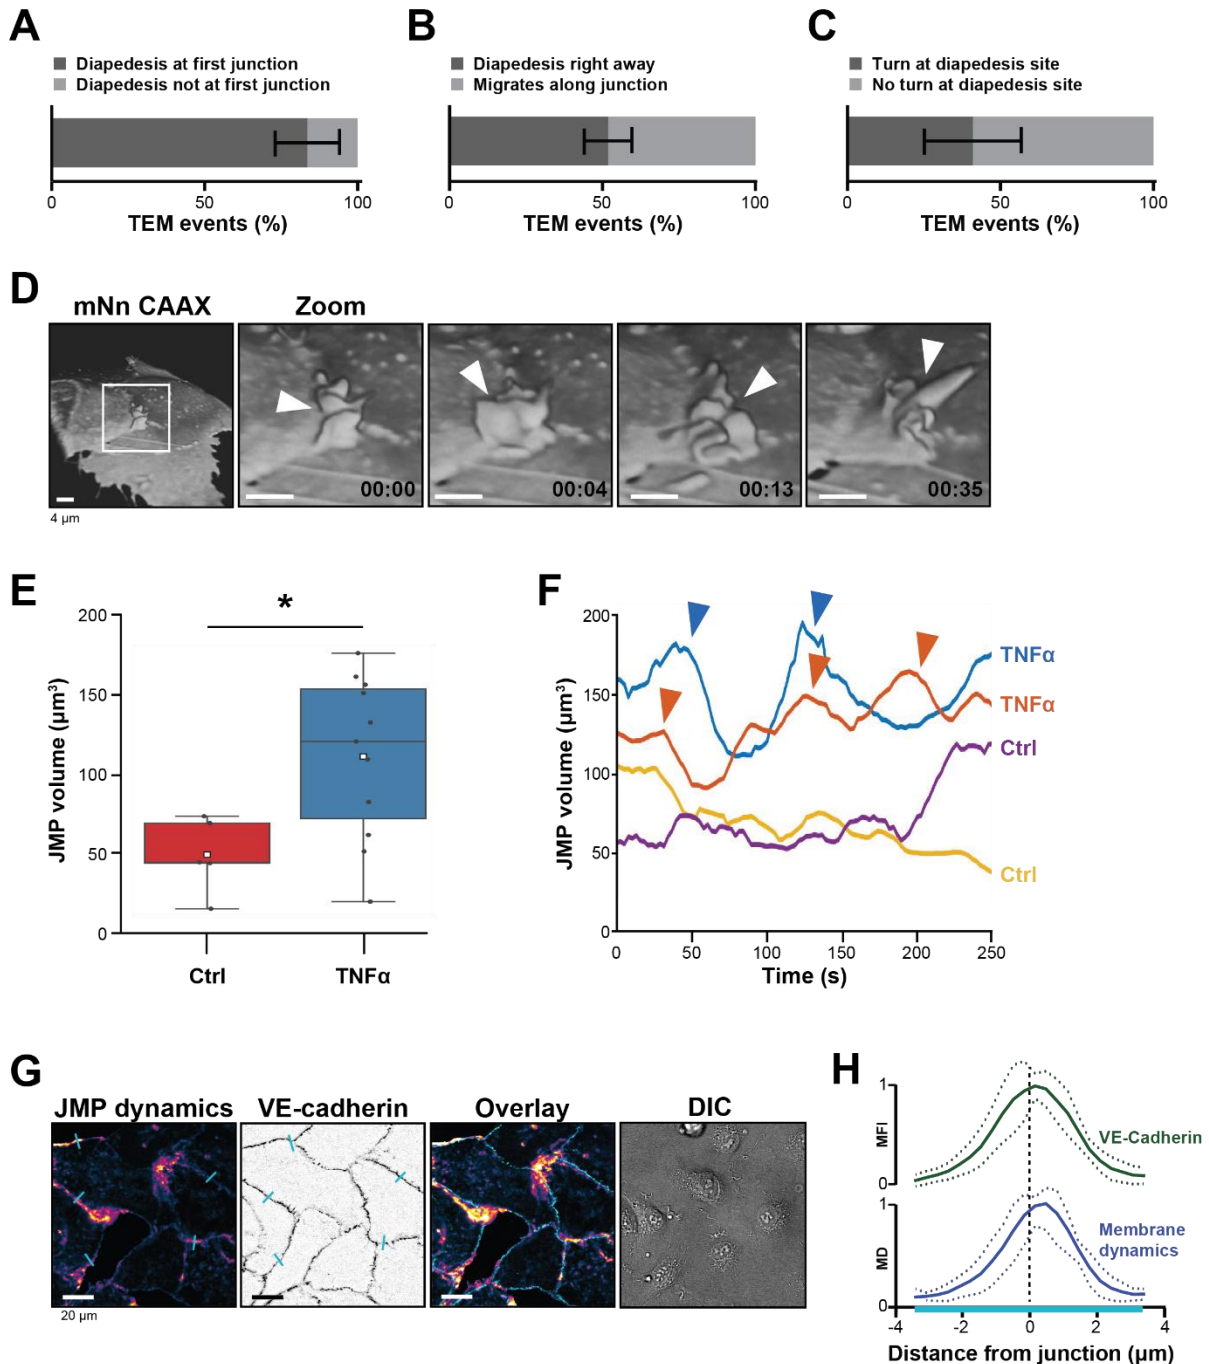

3  
 4 **Figure 1.** Presence of endothelial junctional membrane protrusions. (A) Quantification in percentage of  
 5 diapedesis events at first junction neutrophils encounter (dark bar) versus neutrophils that cross more  
 6 than one junction before transmigrating (light bar). N=3, on average 13 TEM events per experiment.  
 7 Mean  $\pm$  standard deviation (SD). (B) Quantification in percentage of diapedesis events directly upon  
 8 encountering a junction region (dark bar) versus neutrophils that migrate along such junction region prior  
 9 to diapedesis (light bar). N=3, on average 13 TEM events per experiment. Mean  $\pm$  SD. (C) Quantification  
 10 in percentage of diapedesis events at junction regions for neutrophils that cross straight through (dark

1 bar) versus neutrophils that make a turn at junction regions prior to diapedesis (light bar). N=3, on  
2 average 13 TEM events per experiment. Mean  $\pm$  SD. **(D)** 3D-view stills from mNeonGreen CAAX-  
3 transfected HUVECs showing presence of junctional membrane protrusions, indicated by white  
4 arrowheads. Time indicated in seconds in lower right corner. Bar, 4 $\mu$ m. **(E)** Boxplots of the volume  
5 average of 3D junctional membrane protrusions in time upon TNF- $\alpha$  treatment (blue) versus control  
6 (red). White square represents mean. Mann-Whitney U-test: \*p=0.0275. **(F)** Quantification of the  
7 dynamics of JMP volume of control (yellow and purple lines) versus 20h TNF- $\alpha$ -treated (blue and orange  
8 lines) endothelial cells as indicated. 2 representative lines per condition are shown. JMPs from TNF-  
9 treated ECs show more fluctuations in volume than JMPs from control cells as indicated by arrowheads.  
10 **(G)** Junctional membrane dynamics map in pseudo-colors, warm colors indicate high membrane  
11 dynamics, cold colors indicate low membrane dynamics (i), VE-cadherin staining (ii), overlay (iii), and  
12 DIC (iiii). Turquoise lines indicate sites of line scans for quantification. Bar, 20 $\mu$ m. **(H)** Quantification of  
13 normalized fluorescence intensity (MFI) of blue lines as indicated in E by line scan analysis of VE-  
14 cadherin (green) and normalized value from membrane dynamics map (MD) (dark blue). Green and  
15 dark blue lines represent mean of 5 independent junctions, dotted lines show SD.

16

17 **Supplemental Figure 1. JMP dynamics.** **(A)** 3D view stills from mNeonGreen-CAAX-transfected  
18 HUVECs showing presence of junctional membrane protrusions, indicated by white arrowheads. Time  
19 indicated in seconds in lower right corner. Bar, 4 $\mu$ m. **(B)** Segmentation of JMPs (orange) identified from  
20 ECs (blue) used for the quantification of the LLSM images. Numbers in  $\mu$ m. **(C)** Boxplots of the JMP  
21 area average of 3D junctional membrane protrusions in time upon TNF- $\alpha$  treatment (blue) versus control  
22 (red). White square represents mean. Mann-Whitney U-test: p=0.0517. **(H)** Quantification of the  
23 dynamics of JMP volume of control (yellow and purple lines) versus 20h TNF- $\alpha$ -treated (blue and orange  
24 lines) endothelial cells as indicated. 2 representative lines per condition are shown. JMPs from TNF $\alpha$ -  
25 treated ECs show more fluctuations in volume than JMPs from control cells as indicated by arrowheads.

26

27 **Movie S1. Transmigration of neutrophils across TNF $\alpha$ -treated endothelial monolayers.**  
28 Neutrophils crawl around searching for a spot to transmigrate. Some neutrophils use same  
29 TEM spot. Total recording time is 10 minutes.

30

31 **Movie S2. JMP dynamics.** 3D-view time-lapse of Lattice Light Sheet Microscopy recording  
32 from mNeonGreen CAAX-transfected HUVECs showing junctional membrane protrusion  
33 activity. 3D reconstruction using Imaris blend function. Total recording time is 5 minutes. Bar,  
34 5 $\mu$ m

35

36 **Movie S3. JMP volume and area quantification of 20h TNF $\alpha$ -treated endothelial cells.**  
37 Segmentation of JMPs (orange) identified from ECs (blue) used for the quantification of the  
38 LLSM images as described in Materials and Method section.

1  
2  
3  
4  
5  
6  
7  
8  
9  
10  
11  
12  
13  
14  
15  
16  
17  
18  
19  
20  
21  
22  
23  
24  
25  
26  
27  
28  
29  
30  
31  
32  
33  
34  
35  
36  
37

**Movie S4.** *JMP volume and area quantification of non-treated endothelial cells.* Segmentation of JMPs (orange) identified from ECs (blue) used for the quantification of the LLSM images as described in Materials and Method section.

We additionally checked if other inflammatory stimuli, i.e., LPS, INF $\gamma$  and IL1 $\beta$ , changed the dynamic rate of JMPs compared to TNF $\alpha$ . Using the simplified algorithm to generate a membrane dynamics maps, we quantified JMPs by simply taking the mean value of this image (for details see Methods section). We found that all inflammatory stimuli tested showed the same JMP dynamics (Figure S2A). Also, when we tested JMP dynamics in endothelial cells that were isolated from different origin, we did not find differences (Figure S2B). As transmigration events occurred under flow conditions, we tested if flow altered JMP dynamics. Indeed, short-term flow for 5 or 20 minutes did increase JMP activity, whereas exposure of the endothelial cells to longer periods of flow, i.e., 30-60 minutes, reduced JMP dynamics back to basal levels (Figure S2C). We did not find any preference of JMP dynamics at the upstream or downstream side of the flow direction (Figure S2D). Thus, these data show that inflammatory stimuli promote the dynamics but not the actual appearance or size of JMPs.

#### **Neutrophils prefer local exit-sites.**

Given the spatial heterogeneity of the membrane protrusions, we wondered how JMPs are related to the neutrophil exit sites. To investigate this, mNeonGreen CAAX-transduced HUVECs were used to study neutrophil TEM under flow conditions. We found that most neutrophils preferred exit-sites with high-membrane activity (Figure 2A and 2B). As about 50% of the neutrophils showed prolonged crawling time prior to diapedesis (Figure 1B), we compared JMP dynamics of the first junctional region that a crawling neutrophil encountered to the JMP dynamics at sites where the neutrophil underwent diapedesis. In line with the idea that neutrophils preferred JMPs, we found that JMP dynamics were increased at sites where neutrophils transmigrated compared to sites where neutrophils migrated along the junction but did not exit (Figure 2C). Moreover, we found that neutrophils preferred to initiate diapedesis by crawling towards a JMP of the neighboring endothelial cell. Consequently, the neutrophil used this JMP to exit and continued crawling underneath the endothelial cell that generated the JMP (Figure 2D and S2E-F). Interestingly, we observed that once a neutrophil used a JMP to cross the endothelium, other neutrophils followed this path and used the same exit-site (Figure 2E). This was in line with an increase in endothelial JMP dynamics at exit-sites after the first neutrophil crossed (Figure 2F), in line with a recent publication by Hyun and colleagues (Hyun et al., 2019). These data suggest that endothelial JMPs can function as exit-recognition sites that are reinforced by transmigration.



1  
2

## Figure 2

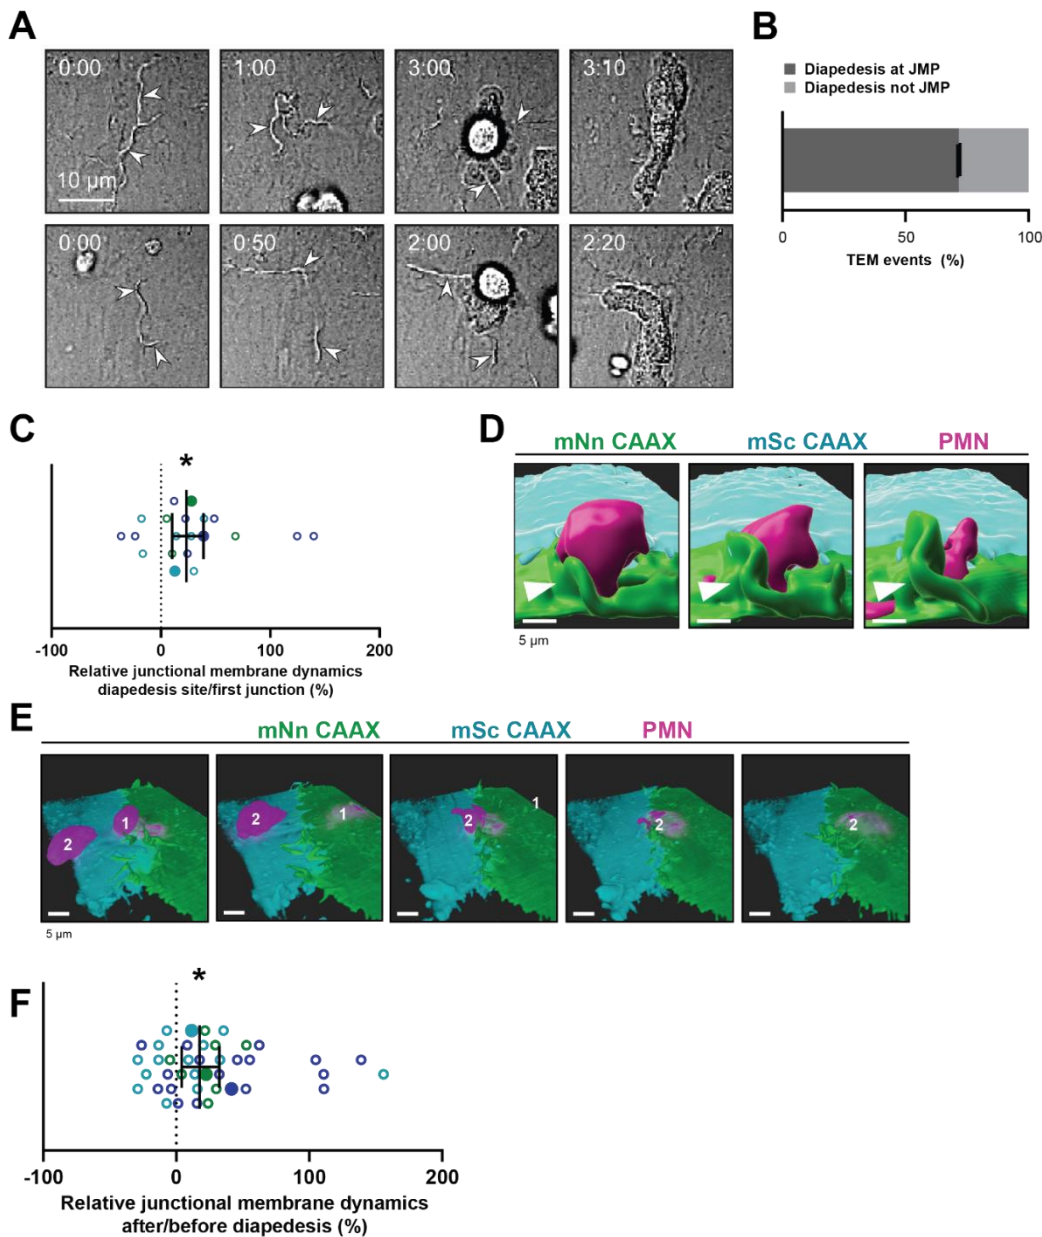

3

4 **Figure 2. Neutrophils use junctional membrane protrusions as diapedesis site. (A)** Stills from two time-  
5 lapse movies showing PMN transendothelial migration (TEM) under flow showing presence of  
6 endothelial membrane ruffles, indicated by white arrowheads. The membrane ruffles are present at the  
7 site of diapedesis already before PMN adhesion and indicate the spot where the PMN will breach the  
8 EC layer. Bar, 10 $\mu$ m. **(B)** Quantification of the number of TEM events that show elevated junctional  
9 membrane dynamics prior to PMN TEM at site of diapedesis. N=3, on average >10 TEM events per  
10 experiment. **(C)** Ratio membrane dynamics at diapedesis site and membrane dynamics at site where a  
11 neutrophil first encounters. Open dots are individual data points from 3 independent experiments (3  
12 colors). Filled dots are means from 3 experiments. Median with 95% confidence interval (CI) are shown.  
13 One-sample Wilcoxon test: \*p=0.0305. **(D)** 3D image stills using Imaris rendering software from two ECs

1 (green/turquoise) and PMN (magenta) showing junctional membrane protrusion at the diapedesis site.  
2 Bar, 5 $\mu$ m. **(E)** 3D view image from two endothelial cells (green/turquoise) and PMN (magenta, labeled  
3 #1) showing a second PMN (labeled #2) transmigrating at the same diapedesis site as the first neutrophil  
4 (#1). Bar, 5 $\mu$ m. **(F)** Ratio JMPs at the diapedesis after and before TEM showing an increase in  
5 endothelial membrane dynamics after diapedesis. Open dots are individual data points from 3  
6 independent experiments (3 colors). Filled dots are means from 3 experiments. Median with 95% CI is  
7 shown. One-sample Wilcoxon test: \*p=0.0006

8  
9 **Supplemental Figure 2. Different stimuli promote JMP dynamics (A-D)** Junctional membrane dynamics  
10 normalized to 20h TNF $\alpha$ -stimulated HUVECs cultured on glass without shear flow. Open dots are  
11 individual data points from 3 independent experiments, represented by 3 different colors. Filled dots are  
12 means from 3 experiments. Median with 95% CI is shown. Dotted line represents a ratio of 1, meaning  
13 no difference. **(A)** JMP dynamics are determined in human umbilical cord-derived, lung-derived,  
14 pancreas-derived and kidney glomerulus-derived endothelial cells. **(B)** JMP dynamics on HUVECs that  
15 were treated for 20h with inflammatory stimuli as indicated. **(C)** JMP dynamics on HUVECs that were  
16 exposed to flow for different periods of time as indicated. **(D)** Location of JMP dynamics on HUVECs on  
17 upstream or downstream side of flow direction for different periods of time as indicated. **(E)** 3D-image  
18 stills from mNeonGreen-CAAX- and mScarlet-I-CAAX-transfected HUVECs showing transmigrating  
19 neutrophil (magenta). 3D reconstruction using Imaris surface rendering function. Bar, 5 $\mu$ m. **(F)** 3D-image  
20 stills from mNeonGreen-CAAX- and mScarlet-I-CAAX-transfected HUVECs showing transmigrating  
21 neutrophil (magenta). 3D reconstruction using Imaris blend function. Bar, 5 $\mu$ m.

## 22 23 24 **PECAM-1-positive JMPs express ICAM-1, ACKR1 and found *in vivo***

25 To study the JMP phenotype in more detail, we used LLSM imaging and found that VE-  
26 cadherin localized at the basolateral area of JMPs but is not present on the actual JMP (Figure  
27 3A). In contrast, junctional PECAM-1/CD31 was present on JMPs (Figure 3B and S3A). Using  
28 a 3D quantification algorithm, we found that PECAM-1 covered at least 50% of the surface of  
29 the JMP (Figure 3C). To examine whether JMPs are found *in vivo* and are correlated to TEM  
30 events, we used the cremaster muscle as a well-established *in vivo* model. The cremaster  
31 muscle of C57BL/6 mice were treated with TNF/IL1 $\beta$  and subsequently stained for PECAM-1  
32 and neutrophil-specific coronin1 (Pick et al., 2017). We found that PECAM-1-rich membrane  
33 protrusions can also be found *in vivo*. As with the *in vitro* data, PECAM-1 covered the apical  
34 protrusions that surrounded adherent neutrophils *in vivo* (Figure 3D). 3D Reconstruction of  
35 these images showed the presence of PECAM-1 on the endothelial apical protrusions (Figure  
36 S3B-C). Thus, these findings show the presence of apical, PECAM-1-decorated endothelial  
37 protrusions under inflammation conditions both *in vitro* and *in vivo*.

1           The atypical chemokine receptor 1 (ACKR1), also referred to as Duffy antigen receptor  
2 for chemokines (DARC/CD234), was recently reported to be present at endothelial cell-cell  
3 junctions and involved in leukocyte TEM (Girbl et al., 2018; Thiriot et al., 2017). To examine  
4 the location of ACKR1, we expressed an mNeonGreen-tagged variant of ACKR1 in HUVECs  
5 together with mScarlet-I-CAAX to label the membrane. We observed that ACKR1 is expressed  
6 at CAAX-identified JMPs (Figure 3E, S3D-E), suggesting that chemokines can be presented  
7 by JMPs. To identify the role of JMPs in the adhesion stage of TEM, we co-expressed ICAM-  
8 1 mScarlet-I and mNeonGreen CAAX in HUVEC. Like ACKR1, ICAM-1 localized to JMPs  
9 (Figure 3F, S3F-G). These results suggest that JMPs are involved in two key steps of TEM,  
10 being chemokine presentation by the endothelial cells to leukocytes as well as the interaction  
11 of endothelial cell adhesion molecules and leukocyte integrins.

## Figure 3

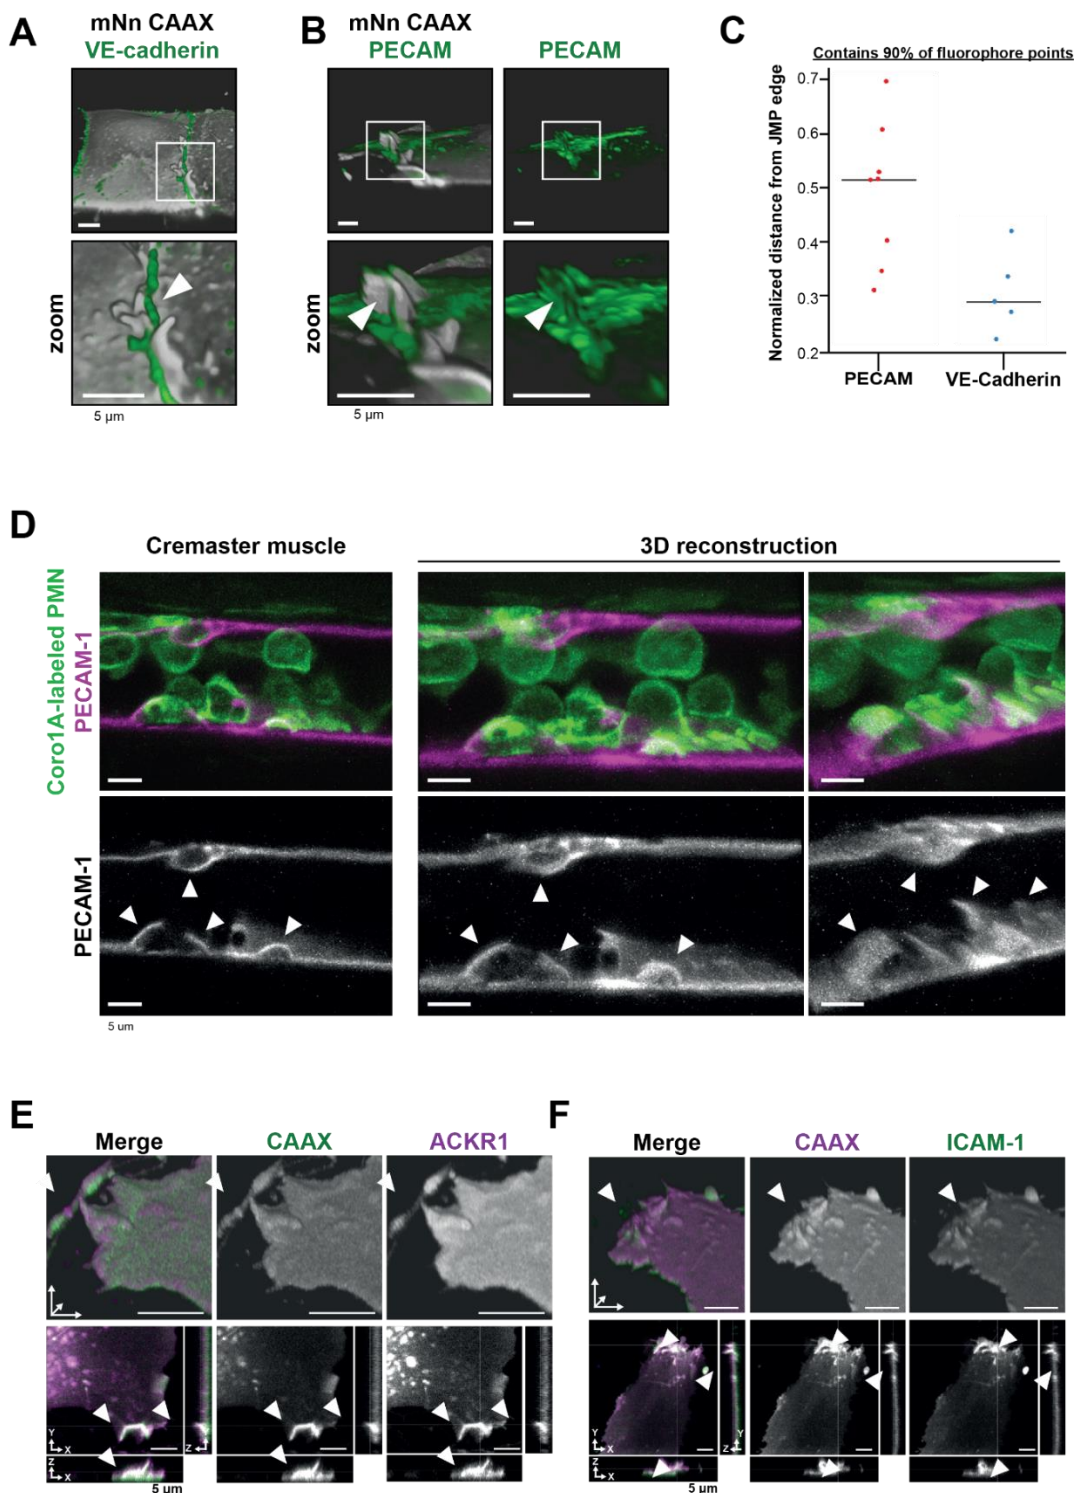

1  
2 **Figure 3.** *PECAM-1-positive junctional membrane protrusions express ICAM-1, ACKR1 and found in*  
3 *in vivo.* (A) LLSM stills from HUVECs expressing membrane-bound CAAX (gray) stained with a directly  
4 conjugated VE-cadherin antibody (green). White box indicates zoom region, displayed below.  
5 Arrowhead points at JMP that does not overlap with the VE-cadherin staining. Bar, 5 $\mu$ m. (B) LLSM stills  
6 from HUVECs expressing the CAAX membrane label (grays) stained with a directly conjugated PECAM-  
7 1 antibody (green). White boxes indicate zoom regions. Arrowhead points at JMP that show overlap with  
8 the PECAM-1 staining. Bar, 5 $\mu$ m. (C) Quantification of LLSM images of fluorescent coverage of PECAM-

1 1 and VE-cadherin on CAAX-positive JMPs, based on 90% of all available fluorophore points on the  
2 volume measurements of the JMPs. Dots indicate one experiment in which one individual JMP is  
3 measured. **(D)** Confocal intravital microscopy of 20–80  $\mu\text{m}$  diameter cremasteric venules in mice with  
4 Coro1A stained neutrophils in green immunostained *in vivo* for EC junctions by intrascrotal injections of  
5 fluorescent-labelled PECAM-1 (red) and stimulated for four hours with IL-1 $\beta$  and TNF- $\alpha$ . Fixed images  
6 in top row show presence of PECAM-1-positive membrane protrusions that surround adherent  
7 neutrophils in green. Two images on the right show reconstruction. Lower row shows PECAM-1 staining  
8 in white only. Arrows show presence of PECAM-1-positive membrane protrusions. Scale bar, 5  $\mu\text{m}$ . **(E)**  
9 Stills from two endothelial cells expressing mScarlet-I-CAAX (green) and mNeonGreen ACKR1  
10 (magenta) showing ACKR1-containing JMPs as indicated by white arrowheads. Bar, 5 $\mu\text{m}$ . **(F)** Stills from  
11 two endothelial cells expressing mScarlet-I-CAAX (green) and mNeonGreen ACKR1 (magenta) showing  
12 ACKR1-containing JMPs as indicated by white arrowheads. Bar, 5 $\mu\text{m}$ .

13  
14 **Supplemental Figure 3. JMPs *in vitro* and *in vivo*.** **(A)** Stills from HUVECs expressing mNeon Green-  
15 CAAX membrane label stained with a directly conjugated PECAM-1 antibody (green). 3D reconstruction  
16 LLSM using Imaris surface rendering function. White box indicates zoom region. Arrow shows PECAM-  
17 1 coverage on JMP. Bar, 5 $\mu\text{m}$ . **(B)** Confocal intravital microscopy of 20–80  $\mu\text{m}$  diameter cremasteric  
18 venules in mice (Coro1A-green neutrophils) immunostained *in vivo* for EC junctions by intrascrotal  
19 injections of fluorescent-labelled PECAM-1 (red) and stimulated for four hours with IL1 $\beta$  and TNF $\alpha$ .  
20 Fixed images show presence of PECAM-1-positive membrane protrusions in red that surround adherent  
21 neutrophils in green. Right image row shows PECAM-1 staining in white only. Scale bar, 5  $\mu\text{m}$ . **(C)**  
22 Confocal intravital microscopy as in B. Right image row shows PECAM-1 staining in white only. Scale  
23 bar, 5  $\mu\text{m}$ . **(D)** Quantification of fluorescence intensity by line scan analysis of ACKR1 (green) together  
24 with membrane marker CAAX (dark blue). **(E)** Stills from two endothelial cells expressing mScarlet-I-  
25 CAAX (green) and mNeonGreen-ACKR1 (magenta) showing ACKR1-containing JMPs as indicated by  
26 white arrowheads. Bar, 5 $\mu\text{m}$ . **(F)** Quantification of fluorescence intensity by line scan analysis of ICAM-  
27 1 (green) together with membrane marker CAAX (dark blue). **(G)** Stills from two endothelial cells  
28 expressing mScarlet-I-CAAX (green) and ICAM-1-GFP (magenta) showing ICAM-1-containing JMPs as  
29 indicated by white arrowheads. Bar, 5 $\mu\text{m}$ .

30  
31

### 32 **Membrane protrusions are regulated by the actin cytoskeleton.**

33 Data from our lab and that of others (Heemskerk et al., 2016; van Rijssel et al., 2012;  
34 Van Buul et al., 2007; Adamson et al., 1999; Barreiro et al., 2002, 2008; Carman & Springer,  
35 2004; Lyck & Enzmann, 2015; Muller, 2015; Vestweber, 2015) indicate a prominent role for the  
36 endothelial actin cytoskeleton in the regulation of TEM. To study the role of the actin  
37 cytoskeleton in JMPs, we used LifeAct-expressing endothelial cells and LLSM imaging, which  
38 revealed that JMPs are rich in F-actin (Figure 4A). To investigate if these structures are also  
39 present *in vivo*, we used Lifeact-GFP knock-in mice (Fracaroli et al., 2012) and studied the

1   inflamed cremaster muscle vessel morphology. As Lifeact-EGFP is mainly expressed in the  
2   vascular endothelium and not in the leukocytes, allowing imaging of the endothelial actin  
3   cytoskeleton with excellent contrast (Fraccaroli et al., 2012), we used these mice to study the  
4   presence of luminal membrane protrusions. *In vivo* time lapse imaging showed actin-rich  
5   vascular structures that protruded apically and were associated with TEM events (Figure 4B).

6         As the Arp2/3 complex is involved in actin nucleation, branching and lamellipodia  
7   formation (Goley & Welch, 2006), we hypothesized that its activity is required for the dynamics  
8   of JMPs. Indeed, treatment of endothelial cells with the Arp2/3 inhibitor CK-666 reduced JMP  
9   dynamics (Figure 4C-D). Next, we studied the functional consequences of perturbing F-actin  
10  branching on neutrophil TEM. However, the use of inhibitors can be problematic in assays that  
11  include two different cell types: inhibitors may diffuse out of the endothelial cells and affect  
12  migration motility of neutrophils under flow conditions. Therefore, we silenced Arp3 in  
13  endothelial cells using shRNA (Figure S4A-B). Indeed, silencing Arp3, with two independent  
14  shRNAs, resulted in reduced number of neutrophils that crossed the endothelial monolayer  
15  under flow conditions (Figure 4E and S4C). To specifically quantify membrane dynamics in  
16  Arp3-deficient endothelial cells, we co-expressed the Arp3 shRNA and mNeonGreen CAAX  
17  from one plasmid, assuring that CAAX-expressing cells were indeed silenced for Arp3 (Figure  
18  S4D-E). Endothelial cells that were silenced for Arp3 showed reduced JMP dynamics (Figure  
19  4F and S4F). These data underscore the importance of actin nucleation by the Arp2/3 complex  
20  for JMP formation and neutrophil TEM.

## Figure 4

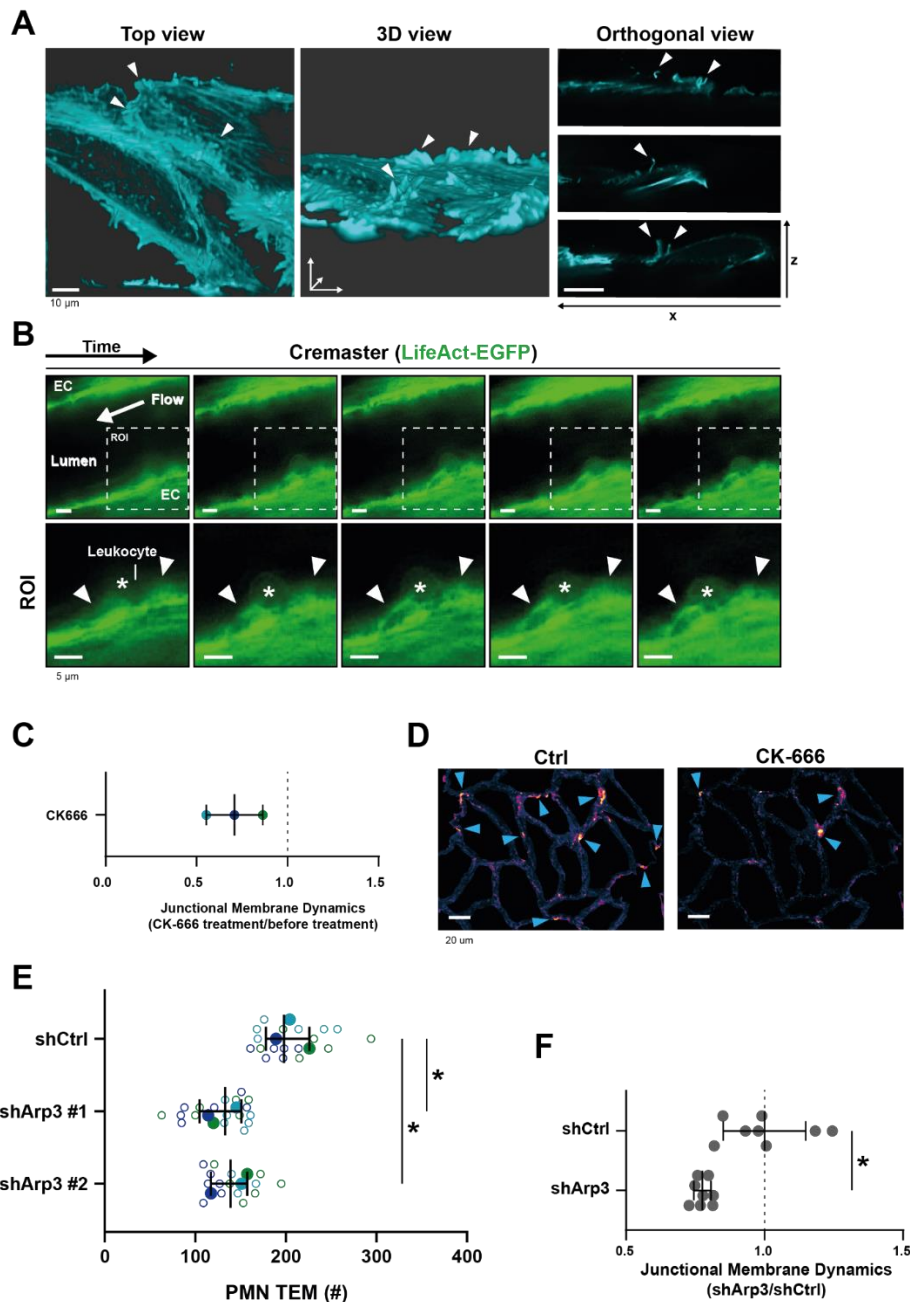

1  
2 **Figure 4. JMP regulation by the actin cytoskeleton.** (A) Stills from two ECs expressing LifeAct-  
3 mTurquoise2 showing F-actin-containing JMPs as indicated by white arrowheads. Bar, 10 $\mu\text{m}$ .  
4 Images at the right show orthogonal view (XZ direction). (B) Confocal intravital microscopy of  
5 cremasteric venules in LifeAct-EGFP mice showing the vasculature after four hours with IL-1 $\beta$   
6 and TNF $\alpha$  stimulation. Leukocyte is indicated by asterisk. Arrowheads show existence of JMPs  
7 *in vivo*. Lower panels show region of interest (ROI) zoom. Bar, 5 $\mu\text{m}$ . (C) JMP dynamics are  
8 measured on HUVECs stimulated with TNF $\alpha$  that are treated with the Arp2/3 inhibitor CK-666.  
9 Ratio of JMP dynamics after/before CK-666 treatment was calculated. Data points from 3  
10 independent experiments are shown in 3 different colors. Median with 95% CI. (D) Example  
11 images of membrane dynamics maps upon CK-666 treatment. Control image is from same

1 cells before CK-666 treatment. Blue arrow heads indicate JMPs. Bar, 20  $\mu\text{m}$ . **(E)** Silencing  
2 endothelial Arp3 with two independent shRNAs reduces number of TEM events. Open dots  
3 are individual data points from 3 independent experiments, represented by 3 different colors.  
4 Filled dots are means from 3 experiments. Median with 95% CI is shown. T-test: Ctrl/sh#1  
5  $p=0.0288$ , Ctrl/sh#2  $p=0.0079$ . **(F)** Silencing endothelial Arp3 reduces CAAX-positive JMP  
6 dynamics. Median with 95% CI is shown. Mann-Whitney U-test:  $*p=0.0002$ .

7  
8 **Supplemental Figure 4. Arp3-mediated JMPs.** **(A)** Western blot analysis shows knockdown of Arp3 in  
9 EC with two independent shRNA constructs. Actin is shown as loading control. **(B)** Quantification of  
10 Western blot in A. T-test: Ctrl/sh#1  $p=0.0393$ , Ctrl/sh#2  $p=0.0330$ . **(C)** Arp3-knockdown (shArp3 #1 and  
11 #2) in ECs reduces neutrophil TEM. Silencing endothelial Arp3 reduced number of TEM events. Data is  
12 normalized to control, dashed line represents ratio of 1, meaning no difference. Open dots are individual  
13 data points from 3 independent experiments, represented by 3 different colors. Filled dots are means  
14 from 3 experiments. Median with 95% CI is shown. T-test: Ctrl/sh#1  $p=0.0183$ , Ctrl/sh#2  $p=0.0121$ . **(D)**  
15 Western blot analysis shows successful knockdown of Arp3 in ECs expressing CAAX. Actin is shown  
16 as loading control. **(E)** Quantification of Western blot in A. **(F)** JMP dynamics map of ECs that are treated  
17 as control or with shRNA Arp3 / mNeonGreen-CAAX. Warm colors indicate increased membrane  
18 dynamics, cold colors indicate low membrane dynamics. Blue arrowheads show sites of increased  
19 membrane dynamics. Bar, 20 $\mu\text{m}$ .

20

## 21 **High Rac1 activity correlates with JMP dynamics and diapedesis exit-sites**

22 Small GTPases of the Rho family, in particular Rac1, are well recognized for their  
23 regulatory role in the formation of lamellipodia (Hall, 2005; Heemskerk et al., 2014) and Arp2/3  
24 activity (Goley & Welch, 2006). To test if Rac1 is required for JMPs, we used a Rac1 inhibitor  
25 (EHT1864) and found that JMP dynamics were reduced (Figure 5A and S5A). Next, we used  
26 FRET-based DORA Rac1 biosensor to measure Rac1 activity at JMPs (Timmerman et al.,  
27 2015). To this end, endothelial cells were transfected with the Rac1 biosensor and with  
28 mScarlet-I-CAAX. The FRET ratio was used as a read-out of Rac1 activity and it was measured  
29 at JMP regions and compared with the average ratio at the full cell junctional region (for details  
30 see Method section). This analysis showed that JMPs displayed a significant increase in Rac1  
31 activation (Figure 5B-C and S5B-C). To correlate Rac1 activation with neutrophil diapedesis,  
32 we mapped the areas where neutrophils crossed the endothelium to the FRET ratio of the  
33 Rac1 biosensor. We found that neutrophils preferred to cross the endothelium at sites with  
34 high FRET ratio (Figure 5D-E and Movie S5). However, no change in Rac1 activity was  
35 detected at regions where neutrophils adhered and crawled on the surface of the endothelium  
36 (Figure S5D-E), indicating that the adhesion and lateral migration of neutrophils themselves  
37 did not trigger Rac1 activity in endothelial cells. Together, these findings reveal that JMPs  
38 depend on Rac1 activity.



## Figure 5

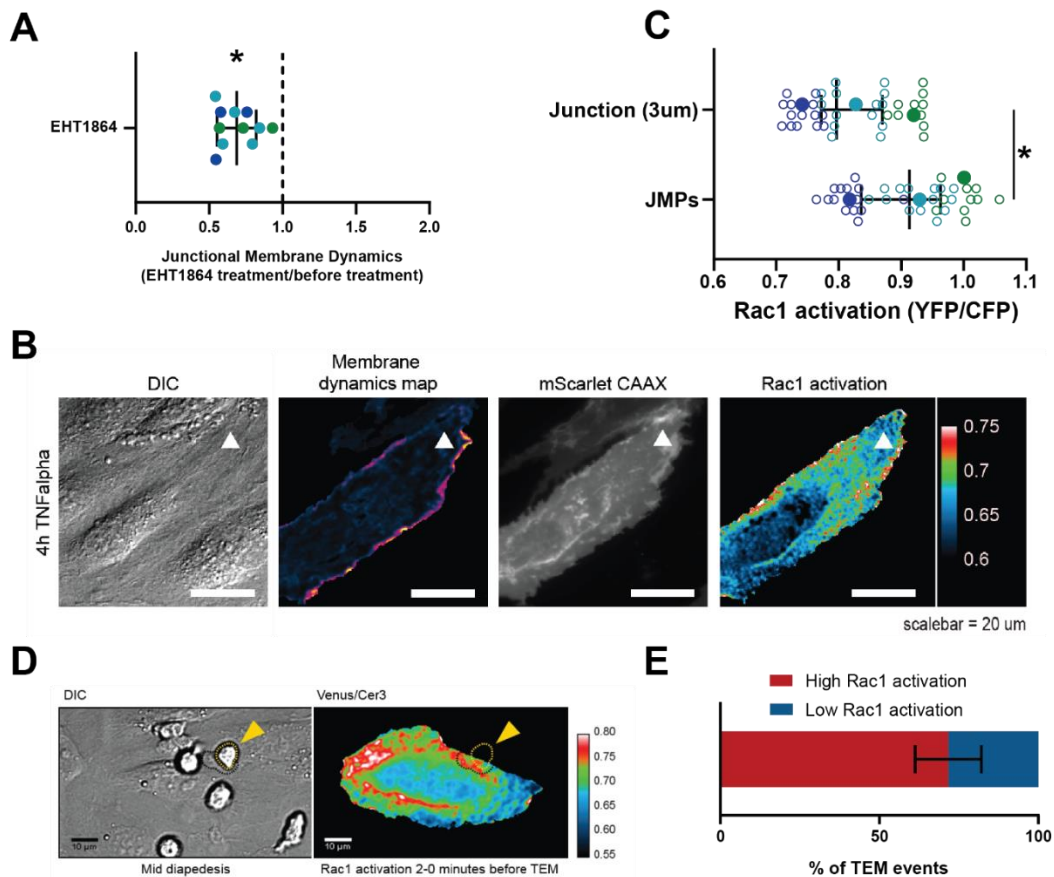

1  
2 **Figure 5. JMPs show high Rac1 activity and function as diapedesis hotspot for neutrophils. (A)** JMP  
3 dynamics are measured on HUVECs stimulated with TNF $\alpha$  that are treated with the Rac1 EHT1864  
4 inhibitor. Ratio of JMP dynamics after/before EHT-1864 treatment was calculated. Data points from 3  
5 independent experiments, represented with 3 different colors, are shown. Median with 95% CI. One-  
6 sample Wilcoxon test: \* $p < 0.0001$ . **(B)** DIC ECs (i), membrane dynamics map in pseudo colors (ii),  
7 mScarlet-I-CAAX membrane label (iii), FRET-based Rac1 biosensor Venus/Cer3 pseudo color ratio-  
8 image (iiii) show that JMPs are correlated with high Rac1 activity (white arrowhead). Scale bar, 20 $\mu$ m.  
9 Calibration bar on the right shows high FRET values in warm colors (red) and low FRET values in cold  
10 colors (blue) **(C)** Quantification of FRET-based Rac1 biosensor activation at JMPs, selected using  
11 mScarlet-I-CAAX, compared to the full junction region of 3 $\mu$ m wide. Open dots are individual data points  
12 from 3 independent experiments, represented with 3 different colors. Filled dots are means from 3  
13 experiments. Median with 95% confidence interval (CI) is shown. T-test: \* $p = 0.0087$ . **(D)** Still from time-  
14 lapse showing PMN TEM under flow. Left image shows DIC of PMN at mid-diapedesis, indicated with  
15 yellow arrowhead. Right image shows FRET-based Rac1 biosensor pseudo-color ratio-image. Yellow  
16 dotted line indicates part of PMN at the luminal side. Dark dotted line indicates part of PMN at basolateral  
17 side. Scale bar, 10 $\mu$ m. **(E)** Graph shows quantification of PMNs that transmigrate at high Rac1 regions  
18 (red bar) versus low Rac1 regions (blue bar).

19

1 **Supplemental Figure 5.** *Endogenous Rac1 activation promotes asymmetric JMPs.* **(A)** Example  
2 images of membrane dynamics maps upon Rac1 inhibition EHT-1864 treatment. Warm colors indicate  
3 increased membrane dynamics, cold colors indicate low membrane dynamics. Blue arrowheads show  
4 sites of increased membrane dynamics. Bar, 20 $\mu$ m. **(B)** Quantification of FRET-based DORA Rac1  
5 biosensor activation at JMPs versus 3  $\mu$ m wide junction regions as explained under C. Dotted line  
6 indicates ratio of 1, meaning no change. Open dots are individual data points from 3 independent  
7 experiments, represented by 3 different colors. Filled dots are means from 3 experiments. Median with  
8 95% CI are shown. One-sample T-test: \* $p=0.101$ . **(C)** Stills from Rac1 biosensor time lapse movie.  
9 mVenus (i), mVenus, JMPs indicated by yellow dotted lines (ii), Rac1 biosensor ratio image, warm colors  
10 indicate high Rac1 activation (iii), Rac1 biosensor ratio image, JMPs indicated by yellow dotted lines (iiii)  
11 Red arrowheads indicate regions of high Rac1 activation and JMPs, blue arrowheads indicate regions  
12 of low Rac1 activation and now JMPs. Bar, 10 $\mu$ m. **(D)** Quantification of FRET-based Rac1 biosensor  
13 activation under the area of crawling PMNs, and the region before and after the PMN has passed. Mann-  
14 Whitney U-test. **(E)** Graph showing example of EC measuring Rac1 activation of whole EC (blue line)  
15 and area of EC underneath a crawling neutrophil (green line). Diapedesis event occurs at the end of the  
16 lines at 210 seconds.

17

18 **Movie S5.** *Neutrophils prefer spots of high Rac1 activity to transmigrate.* FRET-based DORA  
19 Rac1 biosensor shows Rac1 activity in transfected endothelial cells with warm colors (and  
20 white color, as warmest color) as high FRET efficiency. Neutrophil migration is shown in DIC  
21 image on the left and arrow indicate preferred diapedesis site. Note that transfected EC is part  
22 of EC monolayer and surrounded by non-transfected ECs.

23

24

## 25 **Targeted exogenous endothelial Rac1 activation promotes leukocyte transmigration.**

26 At this point, the contribution of the two neighboring endothelial cells to the JMP is  
27 unclear. To study individual, neighboring endothelial cells in more detail, we mixed HUVECs  
28 expressing either mNeonGreen-CAAX or mScarlet-I-CAAX. Mosaic-like expression enabled  
29 us to distinguish individual endothelial cells that were adjacent to one another (Figure S6A).  
30 Interestingly, LLSM showed the presence of asymmetrical JMPs, meaning that one cell  
31 generated the protrusion, while the neighboring cell did not (Figure 6A and S6B). Using  
32 scanning electron microscopy, we confirmed that JMPs displayed an asymmetric phenotype  
33 at endothelial cell-cell junction regions (Figure 6B and S6C). To quantify this, we analyzed  
34 membrane dynamics at JMP regions using mosaic-expressing endothelial cells and found that  
35 one endothelial cell showed higher JMP dynamics compared to the adjacent one, as indicated  
36 by a ratio  $>1$  (Figure 6C). Thus, our data reveal that local JMPs have an asymmetric phenotype  
37 at junction regions.

1           To further assess if local Rac1 activation can trigger the direction of neutrophil  
2 transmigration across an asymmetric junction, we overexpressed the Rac-specific RhoGEF  
3 Tiam1 in endothelial cells. Biochemical analysis showed that the active Tiam1 mutant, C1199,  
4 activated endogenous Rac1 in endothelial cells (Figure S6D). Additional immunofluorescence  
5 imaging revealed that Tiam1 localized at junctions as determined by a perpendicular line scan  
6 across the cell-cell junction indicated by VE-cadherin (Figure S6E and S6F). Similar line scan  
7 analysis showed that Tiam-C1199 recruited F-actin to these sites (Figure S6G), in line with  
8 previous work by Lampugnani and co-workers (Lampugnani et al., 2002). Where endothelial  
9 cells that expressed only control plasmids showed low levels of F-actin at junction regions,  
10 endothelial cells that showed asymmetric expression of Tiam1 (meaning one cell expressed  
11 Tiam1 and the adjacent cell did not) or both endothelial cells expressed Tiam1 showed  
12 increased F-actin content at junction regions (Figure S6H and S6I). The Tiam1-C1199 induced  
13 junctional protrusions were approximately 2.5  $\mu\text{m}$  in height, as was determined by 3D imaging  
14 (Figure 6D) and were reduced in height upon treatment with the Rac1 inhibitor EHT1864  
15 (Figure S7A). When measuring the direction of migrating neutrophils that crossed the  
16 endothelium, we observed that neutrophils preferred to migrate underneath a TIAM-C1199 cell  
17 (Figure 6E and Movie S6). Similar results were found when expressing the constitutive active  
18 variant of Rac1, Rac1-Q61L, in a mosaic manner with control cells expressing LifeAct (Figure  
19 6F and Movie S7). These data show that neutrophils prefer to transmigrate across junctions  
20 that display an asymmetric protrusion on one of the two neighboring endothelial cells. As a  
21 result, neutrophils migrate from the top of an “inactive” cell to underneath the “active” protruding  
22 endothelial cell.

23           Based on these results, we hypothesized that local activation of Rac1, i.e., one  
24 endothelial cell but not the neighboring one, triggers asymmetric JMPs that function as a local  
25 recognition site to drive diapedesis for neutrophils. To test this hypothesis, we used a  
26 genetically encoded photoactivatable Rac1 probe (Wu et al., 2009). By exciting the Lov2  
27 domain, active Rac1 is released and induced local membrane protrusions (Figure S7B-D). We  
28 found that neutrophils preferred to transmigrate in the direction from the non-transfected cell  
29 underneath the PA-Rac1 expressing cell, in line with data presented above (Figure 6G and  
30 Movie S8). Moreover, local activation of the Rac1 probe increased the number of neutrophils  
31 that crossed the endothelium (Figure 6H and S7E).

## Figure 6

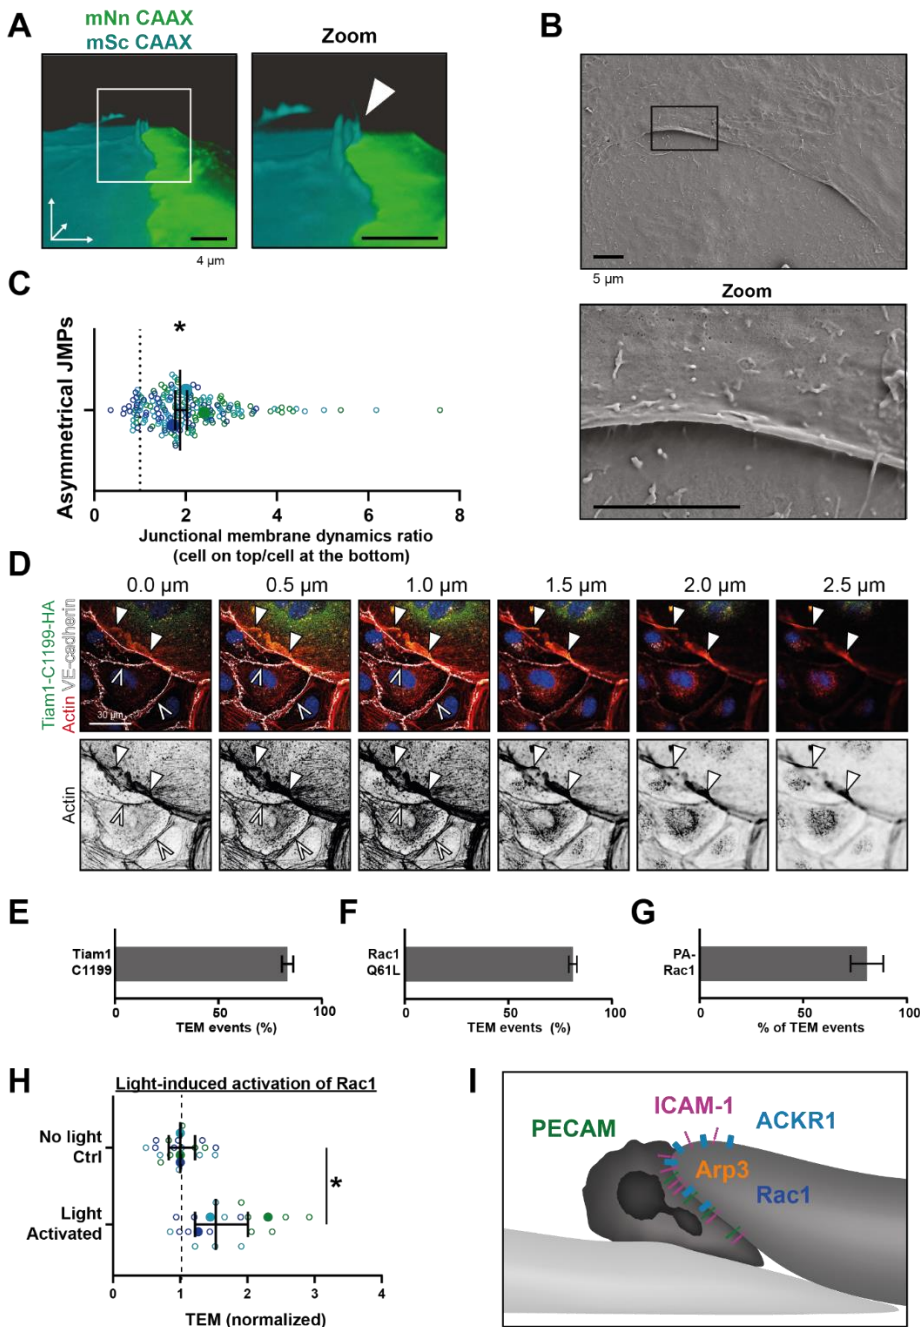

1

2 **Figure 6. Asymmetric JMPs induced by Rac1 and serve as diapedesis sites (A)** 3D view still from two  
3 endothelial cells showing a turquoise expressing EC and a NeonGreen expressing EC. White box  
4 indicates zoom on the right. Arrowhead indicates shows that the turquoise EC displays a membrane  
5 protrusion at the junction region, hence, an asymmetric JMP. Bar, 4 $\mu$ m. **(B)** Scanning electron  
6 microscopy image of asymmetric JMPs. Black box indicates zoom region, displayed on the right. Bar,  
7 5 $\mu$ m. **(C)** Ratio of membrane dynamics in EC with JMP and the other EC at a junction region. Open dots  
8 are individual data points from 3 independent experiments, represented by 3 different colors. Filled dots  
9 are means from 3 experiments. Median with 95% confidence interval (CI) is shown. One-sample T-test:  
10 \* $p=0.344$ . **(D)** Immunofluorescent staining for HA (green), F-actin (red), VE-cadherin (white) and DNA  
11 (blue) on HUVECs transfected with Tiam1-C1199-HA after overnight TNF $\alpha$  stimulation. Filled white

1 arrowheads indicate the F-actin present at the cell-cell junction between a Tiam1-C1199-HA expressing  
2 cell and a control cell, where the open white arrowheads indicate the F-actin present at the junction  
3 between two control cells. Panel shows Z-stack from basal (0.0  $\mu\text{m}$ ) towards apical (2.5  $\mu\text{m}$ ) from left to  
4 right, respectively. Arrowheads indicate presence of F-actin rich membrane ruffles in the different focal  
5 planes. Scale bar, 30 $\mu\text{m}$ . **(E-G)** Quantification of diapedesis direction of PMN upon TEM under flow.  
6 Majority of the PMNs cross form a wt EC underneath a **(E)** TIAM1-C1199, **(F)** Rac1-Q61L, **(G)**  
7 Photoactivatable (PA)-Rac1 EC (dark bar) **(H)** Quantification of PMN TEM under flow in cells expressing  
8 PA-Rac1 either not illuminated (Ctrl) or blue-light illuminated (activated) HUVEC. Data is normalized to  
9 control conditions. Upon Rac1 activation, increased number of neutrophils crossed the EC monolayer.  
10 Open dots are individual data points from 3 independent experiments, represented by 3 different colors.  
11 Filled dots are means from 3 experiments. Median with 95% CI is shown. T-test:  $p=0.0483$ . **(I)** Schematic  
12 overview of neutrophil transmigrating from “inactive” EC (bottom left, light) underneath an “active” EC  
13 (upper right, dark) showing presence of a JMP. JMP displays Rac1 activity, Arp3, and expression of  
14 PECAM-1, ICAM-1 and ACKR1.

15

16 **Supplemental Figure 6. JMPs and exogenous Rac1 activation.** **(A)** Mixed monolayer of ECs either  
17 expressing mNeonGreen-CAAX or mScarlet-I-CAAX **(B)** 3D image stills from two ECs showing the  
18 turquoise cell (right) being on top of the green cell (left). White box indicates zoom region. Arrowhead  
19 indicates asymmetric JMP. CAAX- and mScarlet-I-CAAX-transfected HUVECs showing transmigrating  
20 neutrophil (magenta). 3D reconstruction using Imaris surface rendering function Bar, 5 $\mu\text{m}$ . **(C)** Scanning  
21 electron microscopy image of asymmetric JMPs in two ECs. Black arrowheads show presence of  
22 membrane protrusions. Bar, 5 $\mu\text{m}$ . **(D)** Rac1 activity upon Tiam1-C1199-HA expression in ECs  
23 determined by biochemical Rac1 pulldown assay with biotin-tagged CRIB as bait. Western blot shows  
24 Tiam1 expression level, active and total Rac1 as indicated. Actin is shown as loading control. **(E)**  
25 Quantification of Tiam1-C1199-HA staining intensity in which the red dashed line indicates VE-cadherin  
26 staining that peaks at the cell-cell junction. Fluorescence intensity was quantified within 7.2  $\mu\text{m}$  from the  
27 VE-cadherin positive cell-cell junctions. **(F)** 3D projection of nuclei (blue), Tiam1-C1199-HA (green), F-  
28 actin (red) and VE-cadherin (white) on the junction of a control and Tiam1-C1199-HA expressing EC  
29 showing the enrichment and protrusion towards the apical site of F-actin. **(G)** Quantification of junctional  
30 F-actin staining intensity in control cells (black) and Tiam1-C1199-HA cells (gray) in which the red  
31 dashed line indicates VE-cadherin staining and that peaks at the cell-cell junction. Fluorescence intensity  
32 was quantified within 7.2 $\mu\text{m}$  from the VE-cadherin positive cell-cell junctions. **(H)** Quantification of  
33 junctional F-actin at a control-control junction (Ctrl-Ctrl), an asymmetric junction of one control cell and  
34 one Tiam1-C1199 cell (Ctrl-C1199) and two Tiam1-C1199 cells (C1199-C1199). T-test:  $p<0.05$  **(I)**  
35 Immunofluorescent staining for HA (green), F-actin (red) and VE-cadherin (white) on control ECs and  
36 Tiam1-C1199-transfected ECs. White box indicates area of zoom and images are a maximum intensity  
37 Z-projection. Scale bar, 80 $\mu\text{m}$ . White dashed line indicates site of line scan for measuring fluorescence  
38 intensity indicated in (H).

39

1 **Supplemental Figure 7. JMPs and exogenous Rac1 activation.** (A) Immunofluorescent staining for  
2 Tiam1-C1199-HA (green), F-actin (red) and VE-cadherin (white) on HUVECs after overnight TNF $\alpha$   
3 stimulation. Panel shows Z-stack from basal (0  $\mu$ m) towards apical (2.5  $\mu$ m) from left to right,  
4 respectively. Arrowheads indicate presence of F-actin-rich membrane ruffles in the different focal planes.  
5 Lower panel show cells treated with EHT-1864 (B) Stills from time lapse images of cells expressing PA-  
6 Rac1 illuminated with blue light (frame 3-6). (C) Schematic overview of the photo-reactive LOV2 (light-  
7 oxygen-voltage) domain sterically blocking Rac1 Q61L interactions until irradiation unwinds a helix (J $\alpha$ ),  
8 linking LOV2 to Rac 1 Q61L. This probe can be reversibly and repeatedly activated using 458-473nm  
9 light to generate cell membrane protrusions and ruffling. (D) Quantification of the number of JMPs per  
10 endothelial cell expressing PA-Rac1, either illuminated with blue light to activate PA-Rac1, or not  
11 illuminated as a control. T-test: \*p=0.0035 (E) Quantification of PMN TEM under flow in cells expressing  
12 PA-Rac1 either not illuminated (Ctrl) or blue-light illuminated (activated) HUVEC. Open dots are  
13 individual data points from 3 independent experiments, represented by 3 different colors. Filled dots are  
14 means from 3 experiments. Median with 95% CI is shown. T-test: \*p=0.0483. (F) Percentage of the total  
15 junction that show JMP activity. Data are from at least 20 different junctions from 4 different experiments.  
16

17 **Movie S6. Neutrophils prefer spots of Tiam1-induced JMPs to transmigrate.** Tiam1-C1199 is  
18 transfected in ECs, and can be identified by enlarged phenotype, in middle of movie. This EC  
19 is surrounded by non-transfected ECs. Neutrophils prefer to cross junctions of CTLR-Tiam1  
20 expressing cells. Total recording time is 15 minutes.  
21

22 **Movie S7. Neutrophils prefer to migrate across junctions that asymmetrically display JMP.**  
23 GFP-Rac1-Q61L (green) and mScarlet-Lifeact are transfected in ECs, separately from each  
24 other and show preference for neutrophil TEM. Neutrophils continue to migrate underneath the  
25 Rac1 expressing cell. Total recording time is 10 minutes.  
26

27 **Movie S8. Neutrophils prefer to migrate across junctions that asymmetrically display JMP.**  
28 Photo-activatable Rac1 (green) is transfected in ECs and photoactivated 5 minutes prior to the  
29 start of the movie. Movie shows the preference for neutrophil TEM. Neutrophils continue to  
30 migrate underneath the Rac1 activated cell. Total recording time is 15 minutes.  
31

32 In summary, our data indicate that neutrophils preferred to exit the endothelium through  
33 junctions that display JMPs in an asymmetric manner, meaning that one endothelial cell  
34 exposes an apical protrusion and the other one does not (Figure 6I). These sites can be  
35 recognized as local endothelial TEM hotspots.

## 1 DISCUSSION

2           Upon acute inflammation, neutrophils start to adhere to the inflamed inner layer of the  
3 vessel wall, the endothelium, followed by crawling behavior. When crawling, neutrophils  
4 appear to search for an optimal spot to cross the endothelium. Although there is consensus  
5 that so-called TEM hotspots exist, and are in particularly recognized *in vivo* (Proebstl et al.,  
6 2012; Hyun et al., 2019; Schimmel et al., 2017), it is unclear how such specific exit-spots are  
7 defined and regulated. We found that neutrophils prefer specific, apical membrane structures  
8 generated by endothelial cells, serving as exit-sites on inflamed endothelial monolayers.

9           As leukocytes cross the endothelial barrier within minutes, one requires high resolution  
10 and high-speed imaging technology to be able to capture all details in 3 spatial dimensions in  
11 time. To achieve this, we used lattice light sheet microscopy and discovered the existence of  
12 endothelial membrane structures that protrude apically at junction regions and serve as local  
13 recognition sites for crawling neutrophils. This discovery explains why neutrophils prefer one  
14 junction over the other, namely the junction that displays an apical lamella that functionally  
15 guides the crawling neutrophil through the junctional cleft underneath the endothelial layer.  
16 Hence, such recognition sites may be considered as TEM hotspots. As the membrane  
17 protrusion localizes at the junctions, we decided to name this structure the junctional  
18 membrane protrusion (JMP). Our data suggest that the JMPs open the junctional cleft and  
19 serve as a trap for the crawling neutrophil. JMPs are induced on one endothelial cell whereas  
20 the adjacent one shows low lamella activity. Consequently, a local asymmetric protrusion at  
21 junction regions appears that intercepts crawling neutrophils (Figure 6I). Thus, we have  
22 identified a unique mechanism that is used by crawling immune cells to efficiently cross the  
23 inflamed endothelial barrier in a paracellular manner.

24           There is ample evidence in the literature indicating that TEM “hotspots” exist (Hyun et  
25 al., 2019; Proebstl et al., 2012; Rigby et al., 2015). However, it has been a longstanding  
26 question in the field how such endothelial hotspots are regulated or what would characterize  
27 such hotspots. Many options have been proposed to mediate hotspots. For example, local  
28 stiffness has been proposed to control this, either induced by the substrate underneath the  
29 endothelium or by the endothelium itself by expressing local stiff actin-based structures  
30 (Martinelli et al., 2014; Schaefer et al., 2014). Also local expression of adhesion molecules has  
31 been suggested as one of the key elements for such TEM hotspots (Yang et al., 2005). And  
32 recently, the display of chemokines at junctions has been an attractive hypothesis for the  
33 induction of local exit (Girbl et al., 2018; Pruenster et al., 2009; Thiriot et al., 2017). The work  
34 by Girbl and colleagues showed that during TEM, endothelial-derived chemokines followed by  
35 neutrophil-derived chemokines are presented on the endothelial surface, at junction regions  
36 with the help of ACKR1, to guide the neutrophils through. Our data add to this study by showing

1 that JMPs express ACKR1, as well as ICAM-1 and PECAM-1. We propose that these guiding  
2 molecules need JMPs for optimal exposure to the crawling leukocytes to initiate diapedesis.

3 Many different types of membrane structures have been described to emerge in  
4 endothelial cells. Breslin and colleagues described local lamellipodia to be involved in  
5 controlling the endothelial barrier function (Breslin et al., 2015). These structures depend on  
6 Rac1 signaling and myosin-mediated local tension and show great similarities to JMPs. JMPs  
7 are also regulated by the actin cytoskeleton to the same extent as regular protrusions are  
8 induced. We show a prominent role for actin polymerization, Arp2/3-mediated branching and  
9 involvement of the small Rho GTPase Rac1. When measuring Rac1 activity locally using a  
10 FRET-based biosensor, we find Rac1 to be activated at junction regions of inflamed endothelial  
11 cells, and to co-localize with JMPs. When locally activating Rac1, using a photo-activatable  
12 Rac1 probe, we can drive leukocyte exit on demand. This is, to the best of our knowledge, the  
13 first time that leukocyte extravasation can be triggered on command. For therapeutic potential,  
14 not only can this mechanism now function as a target and pharmacological blockers can be  
15 developed, but more importantly, it may lead to novel strategies to initiate leukocyte traffic to  
16 parts of the body where we wish to have more immune cells present, e.g. for immune cell  
17 therapies.

18 For the regulation aspect: it is important to note that JMPs do not seem to be induced  
19 by leukocytes themselves, but rather through an intrinsic mechanism within the endothelium  
20 triggered by inflammation signals. Indeed, TNF $\alpha$  results in long-term activation of Rac1 (Van  
21 Rijssel et al., 2013; Wójciak-Stothard et al., 1998). Our data does not support a model in which  
22 crawling leukocytes trigger the activity or dynamics of JMPs. When measuring JMP dynamics  
23 in the presence or absence of crawling leukocytes, we did not detect any difference in JMP  
24 activity. Also, the localization of the JMPs did not change when neutrophils were added, and  
25 Rac1 activity did not change when leukocytes crawled on top of an endothelial cells. In addition,  
26 we noticed that neutrophils did not per se choose the site of highest Rac1 activation in an  
27 endothelial cell, presumably because the Rac1 activation itself cannot be sensed from a  
28 distance. We hypothesize that a neutrophil continues to crawl over the endothelium until it  
29 encounters a local JMP, which is associated with high Rac1 activity, which is then used for  
30 diapedesis. We postulate that the regulation of JMPs happens in a stochastic manner, in line  
31 with previous reports showing the stochastic behavior of endothelial cell monolayers in early  
32 immune responses (Lipniacki et al., 2006) and expression of e.g. von Willebrand factor (Yuan  
33 et al., 2016).

34 As endothelial cells are constantly exposed to flow conditions, we expected JMPs to be  
35 influenced by flow as well. To our surprise, we did not measure any differences in JMP  
36 dynamics or distribution in the absence or presence of long-term flow. This was somewhat  
37 surprising, as it is well known that endothelial cells drastically adjust their morphology to long-



1 term flow conditions by polarizing in the direction of the flow with increased Rac1 activity at the  
2 upstream side of the endothelial cell (Kroon et al., 2017; Liu et al., 2013; Tzima et al., 2002).  
3 However, the stochastic regulation of JMPs under inflammatory conditions is independent of  
4 any flow direction. Furthermore, as JMPs localize specifically at intact junction regions, we  
5 believe that these structures are therefore per definition different from junction-associated  
6 intermittent lamellipodia (JAILs) that have been described previously (Cao et al., 2017). JAILs  
7 are regulated by VEGFR2 and local release of junctional tension whereas JMPs are present  
8 as apical structures on top of VE-cadherin-positive junction regions, display several trafficking  
9 molecules and are regulated by inflammatory stimuli.

10 In summary, we have identified an endothelial membrane structure that supports local  
11 exiting of crawling leukocytes. Our data show the presence of such structures *in vivo* as well.  
12 If these structures are also involved and perturbed in diseased conditions is not known but is  
13 an attractive hypothesis and would give new opportunities to target such pathologies.

14

## 1 **MATERIALS AND METHODS**

### 2 **Animals**

3 Lifeact-EGFP transgenic mice have been previously described (Riedl et al., 2010). C57BL/6  
4 mice were obtained from Jackson Laboratory. All animal experiments were conducted in  
5 accordance with German federal animal protection laws and were approved by the Bavarian  
6 Government (Regierung von Oberbayern, Munich, Germany).

7

### 8 **Immunohistochemistry and *in vivo* microscopy of skeletal muscle**

9 Microsurgical preparation of the cremaster muscle and *in vivo* microscopy was performed as  
10 described previously (Rehberg et al., 2010). Briefly, mice were anesthetized using a  
11 ketamine/xylazine mixture (100 mg/kg ketamine and 10 mg/kg xylazine), administered by  
12 intraperitoneal injection. The right cremaster muscle was exposed through a ventral incision of  
13 the scrotum. The muscle was opened ventrally in a relatively avascular zone, using careful  
14 electrocautery to stop any bleeding, and spread over the pedestal of a custom-made  
15 microscopy stage. Epididymis and testicle were detached from the cremaster muscle and  
16 placed into the abdominal cavity. Throughout the procedure as well as after surgical  
17 preparation during *in vivo* microscopy, the muscle was superfused with warm buffered saline.  
18 After *in vivo* microscopy, the tissue was fixed in 2% paraformaldehyde and immunostained as  
19 whole mount. After washing three times with PBS for 15 minutes, cells were embedded in  
20 Fluoromount (Southern Biotech) and analyzed with a Leica SP8X WLL upright confocal  
21 microscope (Leica). Images were analyzed offline using LAS AF software (Leica, Germany),  
22 ImageJ (NIH) and IMARIS (Oxford Instruments).

23

### 24 ***In vivo* microscopy**

25 The setup for *in vivo* microscopy was centered on an AxioTech-Vario 100 Microscope (Zeiss),  
26 equipped with LED excitation light (Zeiss) for fluorescence epi-illumination. Microscopic  
27 images were obtained with a water dipping objective (20x, NA 0.5) and acquired with an  
28 AxioCam Hsm camera and Axiovision 4.6 software.

29

### 30 **Antibodies**

31 For *in vivo* analysis, whole mounts of rmTNF $\alpha$ -treated cremaster muscle of C57BL/6 mice were  
32 stained with the mouse anti-mouse Coro1A mAb (clone 14.1, SCBT, USA) and the secondary  
33 Alexa Fluor donkey 488-conjugated anti-mouse IgG pAb (Thermo Fischer Scientific, USA) and  
34 the Alexa Fluor 667-conjugated rat anti-mouse CD31 mAb (clone MEC133, Biolegend, USA).

35

### 36 **Cell culture**

1 Human Umbilical Vein Endothelial Cells (HUVEC) were purchased from Lonza  
2 (C2519A:0000633426), cultured in Endothelial Growth Medium 2 supplemented with  
3 singlequots (Promocell) (Cat #C-22011) at 37°C in 5% CO<sub>2</sub>. Microvascular ECs were  
4 purchased from PELO Biotech and cultured in Microvascular EC Growth medium  
5 (PELOBiotech) (Cat #PB-MH-100-4099) at 37°C in 5% CO<sub>2</sub>. All cells were grown in culture  
6 flasks, on coverslips and in Ibidi channel slides coated with fibronectin (Sanquin) and used for  
7 experiments at passage 4-6. For shear flow experiments in Ibidi slides 0.8 dyne/cm<sup>2</sup> was  
8 applied.

9

### 10 **Neutrophil transendothelial migration under flow**

11 Polymorphonuclear neutrophils were isolated from whole blood drawn from adult healthy  
12 volunteers as described in (Heemskerk et al., 2016) and kept at room temperature for  
13 maximally 4h prior to the experiment. HUVECs were cultured in a fibronectin-coated Ibidi  $\mu$ -  
14 slide (VI0.4 Ibidi). A perfusion system with HEPES buffer (described before (Heemskerk et al.,  
15 2016)) was connected and a shear flow of 0.8 dyne/cm<sup>2</sup> was applied. Neutrophils were  
16 activated at 37°C for 20-30 min prior to injection into the perfusion system of 1X10<sup>6</sup> neutrophils.  
17 Time-lapse images were recorded for 15-30 minutes on a widefield microscope with a 40x oil  
18 objective at 37°C and 5% CO<sub>2</sub>. Analysis was performed manually using Fiji.

19

### 20 **Quantification modes of TEM**

21 DIC and fluorescence images were recorded every 5 sec. To discriminate from the rolling  
22 phase, a neutrophil was crawling when migration speed was below 10  $\mu$ m/5 sec. Implying that  
23 its location in two subsequent frames is overlapping. We quantified the number of neutrophils  
24 that undergo diapedesis at the first junction they encounter during the crawling phase. We also  
25 distinguished between neutrophils that transmigrate at the first region they arrive at a junction  
26 and neutrophils that crawled along the junction to their diapedesis site which was defined as  
27 being more than 10  $\mu$ m from the region they initially encountered that junction. Neutrophils that  
28 turn around during diapedesis were scored as 'turn' when they were located on top of an  
29 endothelial cell adjacent to the endothelial cell they arrived from the frame before diapedesis.  
30 To determine whether neutrophils transmigrate at JMPs, we set a threshold at the JMP  
31 dynamics map to 2x of the mean. The data to calculate this mean are shown in figure S7F.  
32 When the diapedesis site had a value above this threshold, it was considered as a diapedesis  
33 event at a JMP. These JMP maps were generated from the frames that were collected before  
34 the neutrophil arrived at the diapedesis event, to exclude membrane dynamics because of the  
35 interaction between the neutrophil and the endothelium. To measure the JMP value at the  
36 diapedesis site, a region of interest around the diapedesis site was taken (region 1). To  
37 measure the JMP value at junction region a neutrophil first encounters, a region of interest of

1 10  $\mu\text{m}$  was used (region 2). To get the relative MD increase, the difference between these two  
2 values was divided by the value of region 2. To measure the relative JMP increase before and  
3 after TEM, a region of interest around the diapedesis site was selected. Then the frames before  
4 the neutrophils arrived at this site were used for calculating the JMP value (value 1) before  
5 TEM. To exclude influences of subendothelial crawling of neutrophils, the 30 frames after a  
6 neutrophil left from the diapedesis site were used for calculating the JMP value after TEM  
7 (value 2). The difference between these two values was divided by value 1 to calculate the  
8 relative JMP increase upon diapedesis.

9

## 10 **Expression of fluorescent proteins in HUVEC**

11 HUVECs were transduced with lentiviral particles at passage 3 and seeded in fibronectin-  
12 coated Ibidi slides for flow experiments or on coverslips for static experiments. Cells were  
13 cultured for 2 days and treated over night with 10 ng/ml TNF- $\alpha$  prior to the experiment. For  
14 FRET sensor experiments and Rac1 Q61L/LifeAct experiments, cells (either wildtype, or  
15 mScarlet-I-CAAX transduced cells) were microporated using the Neon Transfection System  
16 (ThermoFisher Scientific) according to manufacturers' protocol and seeded directly in a  
17 fibronectin-coated Ibidi slide. The next day, endothelial cells were treated with 10 ng/ml TNF-  
18  $\alpha$  for 4 hours prior to the experiment.

19

## 20 **Widefield imaging**

21 Widefield images were recorded using a Zeiss Observer Z1 microscope using a 40x NA 1.3 oil  
22 immersion objective at 37 degrees with 5% CO<sub>2</sub>. A HXP 120 V excitation light source at 100%  
23 intensity and a Hamamatsu ORCA-R2 digital CCD camera (100-200 msec exposure time for  
24 fluorescence, 500 msec exposure time for FRET). Image recordings were done every 2  
25 seconds (only CAAX recording) or 4-7 seconds (also DIC and/or FRET recordings).

26

## 27 **JMP maps**

28 HUVECs expressing mNeonGreen-CAAX were imaged on a widefield microscope (Zeiss  
29 Observer) with a 40x oil objective for at least 5 min. Fluorescence images were acquired every  
30 2-7 sec, depending on the experiment and the need for DIC recordings. We developed an  
31 image-based method for quantifying the dynamics in time series. It is based on the notion that  
32 highly dynamic regions will show large fluctuations in intensity. This results in a high standard  
33 deviation in the intensity over time. To extract this information, we generated a macro to  
34 calculate, for each pixel, the standard deviation in the intensity over time. The standard  
35 deviation is normalized by the average intensity and the image essentially depicts the  
36 coefficient of variation. Since the intensity fluctuations may arise from sources other than  
37 membrane dynamics, we implemented corrections for (i) bleaching and (ii) image drift, resulting

1 in a membrane dynamic map that shows the membrane dynamics of a typical time lapse image  
2 of endothelial cells. To focus only on the junctions, the cytoplasm of each cell was selected as  
3 being 3  $\mu\text{m}$  from the junctions and set to NaN. To measure junctional membrane dynamics in  
4 a specific condition, the mean value of that image was taken. For each experiment, the data  
5 was normalized to the condition with HUVEC, cultured on fibronectin-coated glass and treated  
6 for 20h with TNF $\alpha$ .

7

## 8 **Inhibitors**

9 HUVECs expression mNeonGreen-CAAX to measure membrane dynamics were cultured on  
10 coverslips. While imaging 50  $\mu\text{M}$  of EHT1864 or 100  $\mu\text{M}$  CK666 was added. Membrane  
11 dynamics were determined 6 min after adding EHT1864 or 20 sec after adding CK666. Ratio  
12 after versus before inhibitor treatment was calculated from the membrane dynamics values.

13

## 14 **Lattice light sheet microscopy**

15 The lattice light sheet microscope located at the Advanced Imaging Center (AIC) at the Janelia  
16 Research Campus of the Howard Hughes Medical Institute (HHMI) (Chen et al., 2014) was  
17 used. HUVECs stably expressing mNeon Green CAAX or mScarlet-I-CAAX were cultured on  
18 fibronectin-coated 5 mm round glass coverslips (Warner Instruments, Catalog # CS-5R) for 2  
19 days. Cells were stimulated with 10 ng/ml TNF- $\alpha$  20h prior to imaging. Imaging was  
20 performed in HEPES buffer (Heemskerk et al., 2016) at 37 degrees with 5% CO<sub>2</sub> for maximally  
21 30 minutes. Neutrophils were isolated as described before/below, stained for 20 min at 37  
22 degrees with Cell Tracker Deep Red (Invitrogen), washed and centrifuged for 3 min, 400G at  
23 room temperature and added right above the coverslip between the excitation and detection  
24 objectives. 488 nm, 560 nm and 642 nm diode lasers (MPB Communications) at 30 % acousto-  
25 optic tunable filter (AOTF) transmittance and 50 mW initial box power and an excitation  
26 objective (Special Optics, 0.65 NA, 3.74-mm WD) were used for illumination. Fluorescence  
27 was detected via the detection objective (Nikon, CFI Apo LWD 25XW, 1.1 NA) and a sCMOS  
28 camera (Hamamatsu Orca Flash 4.0 v2). Exposure time was 20 ms with 50% AOTF  
29 transmittance and Z-step size was 0.211  $\mu\text{m}$ . Time interval was about 7.5 seconds for 3  
30 channel time-lapse, 5 seconds for 2 channel time-lapse and 2.5 seconds for 1 channel time-  
31 lapse. Point-spread functions were measured using 200 nm tetraspeck beads (Invitrogen cat#  
32 T7280) for each wavelength. Data was deskewed and deconvolved as described in  
33 Supplemental Methods and analyzed using Imaris software.

34

## 35 **Quantification of JMPs**

36 A semi-automated image analysis pipeline is used to identify JMP regions in the cells imaged  
37 using lattice light sheet microscopy. For each frame cell membranes are identified

1 automatically using an Otsu global threshold, and a triangular mesh is created from the  
2 volumetric image data using marching cubes isosurfacing. Local surface variation is measured  
3 in the neighborhood of each vertex. JMPs are identified by a global threshold of surface  
4 variation. Vertices with high surface variation are considered a JMP region. The threshold was  
5 empirically determined and is the same across all datasets. This approach is effective in flat  
6 regions of the cells but is sensitive to the thinner membrane around the nucleus of the cell.  
7 Therefore, the nuclear regions were manually marked and ignored for JMP analysis. After  
8 identification, JMP regions are separated from the cell mesh and capped to create a closed  
9 volume. Area and total region volume are measured in every frame and collected for each  
10 dataset. A coverage estimate of the JMP by PECAM or VE-Cadherin stains is also computed  
11 by considering the distribution of staining across the JMP regions (details in the supplemental  
12 methods). This pipeline was written in MATLAB R2019b (source code can be found on github  
13 at: <https://github.com/aicjanelia/visitor-van-buul>).

14

### 15 **Scanning Electron Microscopy**

16 Samples were fixed in 4% paraformaldehyde and 1% glutaraldehyde for 1 hour at room  
17 temperature and dehydrated using an ethanol series. To reduce sample surface tension,  
18 samples were immersed in hexamethyldisilazane (Sigma-Aldrich) for 30 minutes and air dried.  
19 Before imaging, samples were mounted on aluminum SEM stubs and sputter-coated with a 4  
20 nm platinum-palladium layer using a Leica EM ACE600 sputter coater (Leica Microsystems,  
21 Illinois, USA). Images were acquired at 2 kV using a Zeiss Sigma 300 SEM (Zeiss, Germany).

22

### 23 **FRET imaging**

24 Rac1 activation was measured using a DORA FRET-based Rac1 biosensor as described  
25 before (Timmerman et al., 2015). Briefly, we used a Zeiss Observer Z1 microscope equipped  
26 with a 40x NA 1.3 oil immersion objective, a HXP 120 V excitation light source, a Chroma 510  
27 DCSP dichroic splitter, and two Hamamatsu ORCA-R2 digital CCD cameras to simultaneously  
28 image Cerulean3 and mVenus emission. Data was analyzed using ImageJ software. ROI with  
29 no cells presents throughout the movie was selected for background correction of Cerulean3  
30 and mVenus image stacks. Alignment of Cerulean3 and mVenus was done using the  
31 'MultiStackReg' plugin (<http://rsb.info.nih.gov/ij/plugins/index.html>). To reduce noise a smooth  
32 filter was applied to both image stacks. To correct for bleed through, 0.62xCerulean was  
33 subtracted from the mVenus signal for each frame to get the corrected mVenus stack, which  
34 was divided by Cerulean to calculate the FRET ratio. To define regions of high Rac1 activation,  
35 we selected the 1  $\mu$ m junction of the cell and put a threshold to approximately cover 50% of  
36 the junction. Then diapedesis sites were scored for either high or low Rac1 activity. To measure  
37 Rac1 activation in JMPs, we used the mVenus stacks of the FRET images to select membrane

1 ruffles. These ROIs were projected on the FRET ratio-image and the average FRET value of  
2 such a JMP was calculated. Because the FRET signal is always increased at the junctions  
3 compared to the cell body, we compared the JMP FRET value to the junction of the cell. For  
4 this we selected a border of 3 um per cell and calculated the mean FRET value.

5

## 6 **Photoactivatable-Rac1 probe**

7 Flow experiment was performed as described above. For the control experiments cells were  
8 kept in the dark until neutrophils transmigrated. To switch on photoactivatable Rac-1, channels  
9 were illuminated with blue light from a HXP Light source for 10 seconds prior to neutrophil  
10 injection into the perfusion system.

11

## 12 **Reagents**

13 Alexa Fluor 647 mouse anti human CD144 VE-cadherin (55-7H1) (Cat #561567) and Alexa  
14 Fluor 647 mouse anti human CD31 PECAM (WM59) (Cat #561654) were purchased from BD  
15 and added live 1:100 to cells 15-60 minutes prior to imaging. Recombinant Human TNF-alpha  
16 (300-01A) was purchased from Peprotech and used at 10 ng/ml for 20h (all other experiments)  
17 or 4h (after microporation) before performing the experiment. Recombinant Human IFN-  
18 gamma (R&D) used at 500 ng/ml, IL-1 $\beta$  (Peprotech Cat #200-01B) used at 10 ng/ml and LPS  
19 (Sigma) used at 500 ng/ml were added 20h before imaging.

20

## 21 **Plasmids**

22 mNeonGreen CAAX and mScarlet-I-CAAX were cloned into a lentiviral backbone using HiFi  
23 cloning (NEB). shArp3 were purchased from Merck (TRCN0000029381  
24 (CCGGGCCATGGTATAGTTGAAGATTCTCGAGAATCTTCAACTATACCATGGCTTTTT),  
25 TRCN0000029382  
26 (CCGGCGTCCTCTCTACAAGAATATTCTCGAGAATATTCTTGTAGAGAGGACGTTTT)).  
27 shCtrl (MISSION® pLKO.1-puro Non-Mammalian shRNA Control Plasmid DNA Targets no  
28 known mammalian genes). mNeonGreen-CAAX was cloned into shArp3 vector  
29 (TRCN0000029381) using BamHI and KpnI. The DORA Rac1 FRET biosensor (Timmerman  
30 et al., 2015), mCherry Rac1 Q61L (Klems et al., 2020) and LifeAct GFP (Heemskerk et al.,  
31 2016) have been described previously. pTriEx-mCherry-PA-Rac1 (addgene #22027) was a gift  
32 from Klaus Hahn. mCherry-PA-Rac1 was digested with NdeI and SmaI and cloned into an  
33 empty pLV backbone digested with NdeI and EcoRV, resulting in pLV-mCherry-PA-Rac1.  
34 Lentiviral particles were produced in HEK293T cells using 3rd generation packing plasmids.  
35 Supernatant was harvested 2 and 3 days after transfection, filtered (0.45 um) and concentrated  
36 using Lenti-X Concentrator (TaKaRa). HUVEC transduced with lentiviral particles were used  
37 2-6 days post transduction.

1  
2  
3  
4  
5  
6  
7  
8  
9  
10  
11  
12  
13  
14  
15  
16  
17  
18  
19  
20  
21  
22  
23  
24  
25  
26  
27  
28  
29  
30  
31  
32  
33  
34  
35  
36  
37

## **Confocal laser scanning microscopy and image analysis**

Immunofluorescent staining was in general performed on HUVECS cultured on 12 mm glass coverslips coated with 5 µg/ml FN and treated with or without o/n TNFα (10ng/ml) (Peprotech), washed with PBS+/(1mM CaCl<sub>2</sub> and 0.5mM MgCl<sub>2</sub>), fixated in 4% PFA (Merck), blocked for 30 min with 2% BSA (Affimetrix) and mounted in Mowiol4-88/DABCO solution. Z-stack image acquisition was performed on a confocal laser scanning microscope (Leica SP8) using a 63x NA 1.4 oil immersion objective. 3D reconstruction of Z-stack was made with LasX software (Leica). Junctional actin enrichment was quantified using ImageJ 1.51p. VE-cadherin labeling was used to visualize cell-cell junctions. 30-pixel (0,18 µm/pixel) width line was drawn on junction of interest and cumulative fluorescent actin signal was measured and normalized by total area.

## **Western Blot**

Cells expressing shRNA and selected with puromycin were washed once with PBS supplemented with 1 mM CaCl<sub>2</sub> and 0.5 mM MgCl<sub>2</sub> and lysed with SDS-sample buffer containing 4% b-mercapto-ethanol. Cells expressing shRNA and mNeonGreen CAAX were sorted using a BD Aria III cell sorter based on mNeonGreen fluorescence. mNeonGreen positive cells were centrifuged (200G, 4 degrees, 5 minutes) and lysed with SDS-sample buffer containing 4% b-mercapto-ethanol. Proteins were denatured at 95 degrees for 10 minutes, separated on a NuPage 4-12% Bis-Tris Gel (Invitrogen) and transferred to a nitrocellulose membrane for 1h at 100V. The immunoblots were blocked for 1h with 2.5% milk (w/v) in Tris-buffered saline with Tween20 (TBS-T). Primary and secondary antibodies were incubated overnight at 4 degrees or for 1 hour at room temperature and washed 4 x with TBS-T. Chemiluminescence (Ref# 32106, Thermo Scientific) was detected on light sensitive films (Ref# 47410 19289, Fuji).

## **Rac1 activation assay**

A confluent monolayer of HUVEC in a 100-mm Petri dish was washed with cold PBS (+ 1 mM CaCl<sub>2</sub>; 0.5 mM MgCl<sub>2</sub>) and lysed in 50 mM Tris, pH 7.4, 0.5 mM MgCl<sub>2</sub>, 500 mM NaCl, 1% (vol/vol) Triton X-100, 0.5% (wt/vol) deoxycholic acid, and 0.1% (wt/vol) SDS supplemented with protease inhibitors. Lysates were cleared at 14,000 × g for 5 min. GTP-bound Rac1 was isolated with biotinylated Pak1-Crib peptide coupled to streptavidin agarose (Van Buul et al., 2007). Beads were washed four times in 50 mM Tris, pH 7.4, 0.5 mM MgCl<sub>2</sub>, 150 mM NaCl, 1% (vol/vol) Triton X-100, and protease inhibitors. Pulldowns and lysates were immunoblotted with monoclonal Rac1 antibodies.



# 1 Supplemental methods

## 3 Identification of Cell Membrane Surface

4 The lattice light sheet used at the Advanced Imaging Center, collects images at a 31.8° angle  
5 relative to the coverslip. The images are then “deskewed” to align each z-slice with one  
6 another. In doing so, each z-slice is padded with zeros which can easily throw off any  
7 automated segmentation algorithm. To overcome this challenge, a mask is created to  
8 determine a valid image region for both the deskewed and deconvolved data. The mask is  
9 generated by keeping all non-zero pixels that are identified across the first 50 frames of each  
10 dataset. Each z-slice of the mask has hole-filling applied to make sure there are no internal  
11 holes. Within the masked region, a global threshold is estimated for each cell membrane (Otsu,  
12 1979). Threshold regions smaller than 0.1% of the masked region are discarded. Regions with  
13 convex volume larger than 50% of the mask volume are also discarded. These constraints  
14 avoid falsely identifying cell surfaces in highly noisy frames. Following thresholding, a marching  
15 cubes isosurface algorithm generates a triangle mesh of the cell surface (Lorensen & Cline,  
16 1987).

## 18 Quantification of JMP regions

19 JMP regions are found in areas of high surface variation. A cylinder is computed for each vertex  
20 in the mesh. The cylinder is oriented along the normal of the current vertex with the height and  
21 radius of the cylinder such that it contains all vertices in the  $n$ -neighborhood of the current  
22 vertex (for this work  $n=20$ ). Surface variation for each vertex is defined as the volume of the  
23 cylinder centered at that vertex. The cell surface mesh is smoothed before computing surface  
24 variation, with 4 iterations of mean smoothing with a 1-neighborhood (vertices directly  
25 connected by a mesh edge). This reduces noise to make the calculation of vertex normals and  
26 surface variation more robust.

27 JMP regions are identified by surface variations above a given threshold. In order to provide  
28 consistent results across datasets, a global surface variation threshold of 3.5 was chosen  
29 empirically. JMP regions are further smoothed using a mesh-based morphological opening  
30 with a 1-neighborhood, followed by morphological closing with a 5-neighborhood (Gonzalez &  
31 Woods, 2008). Finally, holes in the JMP regions are filled.

32 To identify individual JMPs, each connected region is isolated into sub meshes. Each submesh  
33 is closed using an approach similar to Liepa (Liepa, 2003). Once each submesh is capped, the  
34 volumes and base areas are measured.

## 1 **Coverage of JMP by PECAM/VE-Cadherin**

2 A PECAM or VE-Cadherin stain value is computed for each vertex on the cell surface mesh.  
3 The stain value at each vertex is calculated as the mean of the 8 voxels surrounding the vertex  
4 in the PECAM or VE-Cadherin channel. Vertices are considered “stained” as long as their stain  
5 value is above an Otsu threshold.

6 To estimate the distribution of stained vertices within a JMP, each vertex in the JMP is also  
7 encoded with its minimum surface distance to the edge of the region. A normalized histogram  
8 of stained vertices binned by distance from the edge is used to approximate the distribution of  
9 PECAM or VE-Cadherin within the JMP region. The normalized histogram is summed to  
10 produce an empirical cumulative distribution function. The distance to the 50<sup>th</sup>, 75<sup>th</sup> and 90<sup>th</sup>  
11 percentile of stained vertices is computed. These percentile distances are normalized by the  
12 maximum JMP edge distance and averaged over time, per dataset. This gives an estimate of  
13 coverage of the JMP by PECAM or VE-Cadherin. If the stain is mostly near the edge, the  
14 normalized percentile distances should be near zero. Whereas, if the stain is distributed  
15 towards the center of the JMP, then the normalized percentile distances should approach one.

16

17

18

## 19 **Conflicts of Interest**

20 The authors declare no conflict of interest.

21

## 22 **Acknowledgements**

23 This work was supported by LSBR grant # 1649 (ACIvS), ZonMW NWO Vici grant # 91819632  
24 (JDvB) and PID2019-108902GB-I00 (Spanish Ministry of Science, Innovation and Universities)  
25 (EM) and NWO ALW-OPEN grant ALWOP.306 (EKM). The Advanced Imaging Center at  
26 Janelia Research Campus is generously sponsored by the Howard Hughes Medical Institute  
27 and the Gordon and Betty Moore Foundation.

## 1 REFERENCES

- 2 Abadier, M., Haghayegh Jahromi, N., Cardoso Alves, L., Boscacci, R., Vestweber, D.,  
3 Barnum, S., Deutsch, U., Engelhardt, B., & Lyck, R. (2015). Cell surface levels of  
4 endothelial ICAM-1 influence the transcellular or paracellular T-cell diapedesis across  
5 the blood-brain barrier. *European Journal of Immunology*, *45*(4), 1043–1058.  
6 <https://doi.org/10.1002/eji.201445125>
- 7 Abtin, A., Jain, R., Mitchell, A. J., Roediger, B., Brzoska, A. J., Tikoo, S., Cheng, Q., Ng, L.  
8 G., Cavanagh, L. L., von Andrian, U. H., Hickey, M. J., Firth, N., & Weninger, W. (2014).  
9 Perivascular macrophages mediate neutrophil recruitment during bacterial skin  
10 infection. *Nature Immunology*, *15*(1), 45–53. <https://doi.org/10.1038/ni.2769>
- 11 Adamson, P., Etienne, S., Couraud, P. O., Calder, V., & Greenwood, J. (1999). Lymphocyte  
12 migration through brain endothelial cell monolayers involves signaling through  
13 endothelial ICAM-1 via a rho-dependent pathway. *Journal of Immunology (Baltimore,*  
14 *Md. : 1950)*, *162*(5), 2964–2973.
- 15 Alon, R., & van Buul, J. D. (2017). Leukocyte Breaching of Endothelial Barriers: The Actin  
16 Link. *Trends in Immunology*, *38*(8), 606–615. <https://doi.org/10.1016/j.it.2017.05.002>
- 17 Barreiro, O., Yanez-Mo, M., Serrador, J. M., Montoya, M. C., Vicente-Manzanares, M.,  
18 Tejedor, R., Furthmayr, H., & Sanchez-Madrid, F. (2002). Dynamic interaction of VCAM-  
19 1 and ICAM-1 with moesin and ezrin in a novel endothelial docking structure for  
20 adherent leukocytes. *The Journal of Cell Biology*, *157*(7), 1233–1245.  
21 <https://doi.org/10.1083/jcb.200112126>
- 22 Barreiro, O., Zamai, M., Yáñez-Mó, M., Tejera, E., López-Romero, P., Monk, P. N., Gratton,  
23 E., Caiolfa, V. R., & Sánchez-Madrid, F. (2008). Endothelial adhesion receptors are  
24 recruited to adherent leukocytes by inclusion in preformed tetraspanin nanoplateforms.  
25 *The Journal of Cell Biology*, *183*(3), 527–542. <https://doi.org/10.1083/jcb.200805076>
- 26 Breslin, J. W., Zhang, X. E., Worthylake, R. A., & Souza-Smith, F. M. (2015). Involvement of  
27 local lamellipodia in endothelial barrier function. *PLoS ONE*, *10*(2).  
28 <https://doi.org/10.1371/journal.pone.0117970>
- 29 Butcher, E. C. (1991). Leukocyte-endothelial cell recognition: Three (or more) steps to  
30 specificity and diversity. In *Cell* (Vol. 67, Issue 6, pp. 1033–1036). Elsevier.  
31 [https://doi.org/10.1016/0092-8674\(91\)90279-8](https://doi.org/10.1016/0092-8674(91)90279-8)
- 32 Cao, J., Ehling, M., März, S., Seebach, J., Tarbashevich, K., Sixta, T., Pitulescu, M. E.,  
33 Werner, A.-C., Flach, B., Montanez, E., Raz, E., Adams, R. H., & Schnittler, H. (2017).  
34 Polarized actin and VE-cadherin dynamics regulate junctional remodelling and cell  
35 migration during sprouting angiogenesis. *Nature Communications*, *8*(1), 2210.  
36 <https://doi.org/10.1038/s41467-017-02373-8>
- 37 Carman, C. V., Jun, C.-D., Salas, A., & Springer, T. A. (2003). Endothelial Cells Proactively

- 1 Form Microvilli-Like Membrane Projections upon Intercellular Adhesion Molecule 1  
2 Engagement of Leukocyte LFA-1. *The Journal of Immunology*, 171(11), 6135–6144.  
3 <https://doi.org/10.4049/jimmunol.171.11.6135>
- 4 Carman, C. V., & Springer, T. A. (2004). A transmigratory cup in leukocyte diapedesis both  
5 through individual vascular endothelial cells and between them. *Journal of Cell Biology*,  
6 167(2), 377–388. <https://doi.org/10.1083/jcb.200404129>
- 7 Carman, C. V. (2009). Mechanisms for transcellular diapedesis: probing and pathfinding by  
8 “invadosome-like protrusions”. *Journal of Cell Science*, 122(Pt 17), 3025–3035.  
9 <https://doi.org/10.1242/jcs.047522>
- 10 Chen, B.-C., Legant, W. R., Wang, K., Shao, L., Milkie, D. E., Davidson, M. W.,  
11 Janetopoulos, C., Wu, X. S., Hammer, J. A. 3rd, Liu, Z., English, B. P., Mimori-Kiyosue,  
12 Y., Romero, D. P., Ritter, A. T., Lippincott-Schwartz, J., Fritz-Laylin, L., Mullins, R. D.,  
13 Mitchell, D. M., Bembenek, J. N., ... Betzig, E. (2014). Lattice light-sheet microscopy:  
14 imaging molecules to embryos at high spatiotemporal resolution. *Science (New York,*  
15 *N. Y.)*, 346(6208), 1257998. <https://doi.org/10.1126/science.1257998>
- 16 Fraccaroli, A., Franco, C. A., Rognoni, E., Neto, F., Rehberg, M., Aszodi, A., Wedlich-  
17 Söldner, R., Pohl, U., Gerhardt, H., & Montanez, E. (2012). Visualization of endothelial  
18 actin cytoskeleton in the mouse retina. *PloS One*, 7(10), e47488.  
19 <https://doi.org/10.1371/journal.pone.0047488>
- 20 Girbl, T., Lenn, T., Perez, L., Rolas, L., Barkaway, A., Thiriot, A., Del Fresno, C., Lynam, E.,  
21 Hub, E., Thelen, M., Graham, G., Alon, R., Sancho, D., von Andrian, U. H., Voisin, M.-  
22 B., Rot, A., & Nourshargh, S. (2018). Distinct Compartmentalization of the Chemokines  
23 CXCL1 and CXCL2 and the Atypical Receptor ACKR1 Determine Discrete Stages of  
24 Neutrophil Diapedesis. *Immunity*, 49(6), 1062–1076.e6.  
25 <https://doi.org/10.1016/j.immuni.2018.09.018>
- 26 Goley ED, Welch MD.(2006). The ARP2/3 complex: an actin nucleator comes of age. *Nat*  
27 *Rev Mol Cell Biol*. Oct;7(10):713-26. doi: 10.1038/nrm2026.
- 28 Gonzalez, R. C., & Woods, R. E. (2008). *Digital Image Processing* (3rd ed.). Pearson.
- 29 Hall, A. (2005). Rho GTPases and the control of cell behaviour. *Biochemical Society*  
30 *Transactions*, 33(Pt 5), 891–895. <https://doi.org/10.1042/BST20050891>
- 31 Heemskerk, N., Schimmel, L., Oort, C., van Rijssel, J., Yin, T., Ma, B., van Unen, J., Pitter,  
32 B., Huveneers, S., Goedhart, J., Wu, Y., Montanez, E., Woodfin, A., & van Buul, J. D.  
33 (2016). F-actin-rich contractile endothelial pores prevent vascular leakage during  
34 leukocyte diapedesis through local RhoA signalling. *Nature Communications*, 7, 10493.  
35 <https://doi.org/10.1038/ncomms10493>
- 36 Heemskerk, N., Van Rijssel, J., & Van Buul, J. D. (2014). Rho-GTPase signaling in leukocyte  
37 extravasation: An endothelial point of view. *Cell Adhesion and Migration*, 8(2), 67–75.

- 1 <https://doi.org/10.4161/cam.28244>
- 2 Hyun, Y.-M., Choe, Y. H., Park, S. A., & Kim, M. (2019). LFA-1 (CD11a/CD18) and Mac-1  
3 (CD11b/CD18) distinctly regulate neutrophil extravasation through hotspots I and II.  
4 *Experimental & Molecular Medicine*, 51(4), 1–13. [https://doi.org/10.1038/s12276-019-](https://doi.org/10.1038/s12276-019-0227-1)  
5 0227-1
- 6 Isac, L., Thoelking, G., Schwab, A., Oberleithner, H., & Riethmuller, C. (2011). Endothelial f-  
7 actin depolymerization enables leukocyte transmigration. *Analytical and Bioanalytical*  
8 *Chemistry*, 399(7), 2351–2358. <https://doi.org/10.1007/s00216-010-3978-z>
- 9 Klems, A., van Rijssel, J., Ramms, A. S., Wild, R., Hammer, J., Merkel, M., Derenbach, L.,  
10 Préau, L., Hinkel, R., Suarez-Martinez, I., Schulte-Merker, S., Vidal, R., Sauer, S.,  
11 Kivelä, R., Alitalo, K., Kupatt, C., van Buul, J. D., & le Noble, F. (2020). The GEF Trio  
12 controls endothelial cell size and arterial remodeling downstream of Vegf signaling in  
13 both zebrafish and cell models. *Nature Communications*, 11(1), 5319.  
14 <https://doi.org/10.1038/s41467-020-19008-0>
- 15 Kroon, J., Heemskerk, N., Kalsbeek, M. J. T., de Waard, V., van Rijssel, J., & van Buul, J. D.  
16 (2017). Flow-induced endothelial cell alignment requires the RhoGEF Trio as a scaffold  
17 protein to polarize active Rac1 distribution. *Molecular Biology of the Cell*, 28(13), 1745–  
18 1753. <https://doi.org/10.1091/mbc.E16-06-0389>
- 19 Lampugnani, M. G., Zanetti, A., Breviario, F., Balconi, G., Orsenigo, F., Corada, M.,  
20 Spagnuolo, R., Betson, M., Braga, V., & Dejana, E. (2002). VE-cadherin regulates  
21 endothelial actin activating Rac and increasing membrane association of Tiam.  
22 *Molecular Biology of the Cell*, 13(4), 1175–1189. [https://doi.org/10.1091/mbc.01-07-](https://doi.org/10.1091/mbc.01-07-0368)  
23 0368
- 24 Liepa, P. (2003). Filling Holes in Meshes. *Proceedings of the 2003 Eurographics/ACM*  
25 *SIGGRAPH Symposium on Geometry Processing*, 200–205.
- 26 Lipniacki, T., Paszek, P., Brasier, A. R., Luxon, B. A., & Kimmel, M. (2006). Stochastic  
27 regulation in early immune response. *Biophysical Journal*, 90(3), 725–742.  
28 <https://doi.org/10.1529/biophysj.104.056754>
- 29 Liu, Y., Collins, C., Kiosses, W. B., Murray, A. M., Joshi, M., Shepherd, T. R., Fuentes, E. J.,  
30 & Tzima, E. (2013). A novel pathway spatiotemporally activates Rac1 and redox  
31 signaling in response to fluid shear stress. *The Journal of Cell Biology*, 201(6), 863–  
32 873. <https://doi.org/10.1083/jcb.201207115>
- 33 Lorensen, W. E., & Cline, H. E. (1987). Marching Cubes: A High Resolution 3D Surface  
34 Construction Algorithm. *SIGGRAPH Comput. Graph.*, 21(4), 163–169.  
35 <https://doi.org/10.1145/37402.37422>
- 36 Lyck, R., & Enzmann, G. (2015). The physiological roles of ICAM-1 and ICAM-2 in neutrophil  
37 migration into tissues. In *Current Opinion in Hematology* (Vol. 22, Issue 1, pp. 53–59).

- 1 Lippincott Williams and Wilkins. <https://doi.org/10.1097/MOH.000000000000103>
- 2 Martinelli, R., Zeiger, A. S., Whitfield, M., Sciuto, T. E., Dvorak, A., Van Vliet, K. J.,  
3 Greenwood, J., & Carman, C. V. (2014). Probing the biomechanical contribution of the  
4 endothelium to lymphocyte migration: diapedesis by the path of least resistance.  
5 *Journal of Cell Science*, 127(Pt 17), 3720–3734. <https://doi.org/10.1242/jcs.148619>
- 6 Muller, W. A. (2015). The regulation of transendothelial migration: new knowledge and new  
7 questions. *Cardiovascular Research*, 107(3), 310–320.  
8 <https://doi.org/10.1093/cvr/cvv145>
- 9 Muller, W. A. (2016). Localized signals that regulate transendothelial migration. *Current*  
10 *Opinion in Immunology*, 38, 24–29. <https://doi.org/10.1016/j.coi.2015.10.006>
- 11 Nourshargh, S., & Alon, R. (2014). Leukocyte Migration into Inflamed Tissues. In *Immunity*  
12 (Vol. 41, Issue 5, pp. 694–707). Elsevier. <https://doi.org/10.1016/j.immuni.2014.10.008>
- 13 Otsu, N. (1979). A Threshold Selection Method from Gray-Level Histograms. *IEEE*  
14 *Transactions on Systems, Man, and Cybernetics*, 9(1), 62–66.  
15 <https://doi.org/10.1109/TSMC.1979.4310076>
- 16 Proebstl, D., Voisin, M.-B., Woodfin, A., Whiteford, J., D'Acquisto, F., Jones, G. E., Rowe, D.,  
17 & Nourshargh, S. (2012). Pericytes support neutrophil subendothelial cell crawling and  
18 breaching of venular walls in vivo. *The Journal of Experimental Medicine*, 209(6), 1219–  
19 1234. <https://doi.org/10.1084/jem.20111622>
- 20 Pruenster, M., Mudde, L., Bombosi, P., Dimitrova, S., Zsak, M., Middleton, J., Richmond, A.,  
21 Graham, G. J., Segerer, S., Nibbs, R. J. B., & Rot, A. (2009). The Duffy antigen receptor  
22 for chemokines transports chemokines and supports their promigratory activity. *Nature*  
23 *Immunology*, 10(1), 101–108. <https://doi.org/10.1038/ni.1675>
- 24 Rehberg, M., Praetner, M., Leite, C. F., Reichel, C. A., Bihari, P., Mildner, K., Duhr, S.,  
25 Zeuschner, D., & Krombach, F. (2010). Quantum dots modulate leukocyte adhesion and  
26 transmigration depending on their surface modification. *Nano Letters*, 10(9), 3656–  
27 3664. <https://doi.org/10.1021/nl102100m>
- 28 Riedl, J., Flynn, K. C., Raducanu, A., Gärtner, F., Beck, G., Bösl, M., Bradke, F., Massberg,  
29 S., Aszodi, A., Sixt, M., & Wedlich-Söldner, R. (2010). Lifeact mice for studying F-actin  
30 dynamics. *Nature Methods*, 7(3), 168–169. <https://doi.org/10.1038/nmeth0310-168>
- 31 Rigby, D. A., Ferguson, D. J. P., Johnson, L. A., & Jackson, D. G. (2015). Neutrophils rapidly  
32 transit inflamed lymphatic vessel endothelium via integrin-dependent proteolysis and  
33 lipoxin-induced junctional retraction. *Journal of Leukocyte Biology*, 98(6), 897–912.  
34 <https://doi.org/10.1189/jlb.1HI0415-149R>
- 35 Schaefer, A., Riet, J. te, Ritz, K., Hoogenboezem, M., Anthony, E. C., Mul, F. P. J., de Vries,  
36 C. J., Daemen, M. J., Figdor, C. G., van Buul, J. D., & Hordijk, P. L. (2014). Actin-  
37 binding proteins differentially regulate endothelial cell stiffness, ICAM-1 function and

- 1 neutrophil transmigration. *Journal of Cell Science*, 127(20), 4470–4482.  
2 <https://doi.org/10.1242/jcs.154708>
- 3 Schenkel, A. R., Mamdouh, Z., & Muller, W. A. (2004). Locomotion of monocytes on  
4 endothelium is a critical step during extravasation. *Nature Immunology*, 5(4), 393–400.  
5 <https://doi.org/10.1038/ni1051>
- 6 Schimmel, L., Heemskerk, N., & van Buul, J. D. (2017). Leukocyte transendothelial migration:  
7 A local affair. *Small GTPases*, 8(1), 1–15.  
8 <https://doi.org/10.1080/21541248.2016.1197872>
- 9 Schimmel, L., van der Stoel, M., Rianna, C., van Stalborch, A.-M. M., de Ligt, A.,  
10 Hoogenboezem, M., Tol, S., van Rijssel, J., Szulcek, R., Bogaard, H. J., Hofmann, P.,  
11 Boon, R., Radmacher, M., de Waard, V., Huveneers, S., & van Buul, J. D. (2018).  
12 Stiffness-Induced Endothelial DLC-1 Expression Forces Leukocyte Spreading through  
13 Stabilization of the ICAM-1 Adhesome. *Cell Reports*, 24(12), 3115–3124.  
14 <https://doi.org/10.1016/j.celrep.2018.08.045>
- 15 Shulman, Z., Shinder, V., Klein, E., Grabovsky, V., Yeger, O., Geron, E., Montresor, A.,  
16 Bolomini-Vittori, M., Feigelson, S. W., Kirchhausen, T., Laudanna, C., Shakhar, G., &  
17 Alon, R. (2009). Lymphocyte crawling and transendothelial migration require chemokine  
18 triggering of high-affinity LFA-1 integrin. *Immunity*, 30(3), 384–396.  
19 <https://doi.org/10.1016/j.immuni.2008.12.020>
- 20 Springer, T. A. (1994). Traffic signals for lymphocyte recirculation and leukocyte emigration:  
21 The multistep paradigm. In *Cell* (Vol. 76, Issue 2, pp. 301–314). Elsevier.  
22 [https://doi.org/10.1016/0092-8674\(94\)90337-9](https://doi.org/10.1016/0092-8674(94)90337-9)
- 23 Thiriot, A., Perdomo, C., Cheng, G., Novitzky-Basso, I., McArdle, S., Kishimoto, J. K.,  
24 Barreiro, O., Mazo, I., Triboulet, R., Ley, K., Rot, A., & von Andrian, U. H. (2017).  
25 Differential DARC/ACKR1 expression distinguishes venular from non-venular  
26 endothelial cells in murine tissues. *BMC Biology*, 15(1), 45.  
27 <https://doi.org/10.1186/s12915-017-0381-7>
- 28 Timmerman, Daniel, A. E., Kroon, J., & van Buul, J. D. (2016). Leukocytes Crossing the  
29 Endothelium: A Matter of Communication. *International Review of Cell and Molecular*  
30 *Biology*, 322, 281–329. <https://doi.org/10.1016/bs.ircmb.2015.10.005>
- 31 Timmerman, I., Heemskerk, N., Kroon, J., Schaefer, A., van Rijssel, J., Hoogenboezem, M.,  
32 van Unen, J., Goedhart, J., Gadella, T. W. J., Yin, T., Wu, Y., Huveneers, S., & van  
33 Buul, J. D. (2015). A local VE-cadherin and Trio-based signaling complex stabilizes  
34 endothelial junctions through Rac1. *Journal of Cell Science*, 128(16), 3041–3054.  
35 <https://doi.org/10.1242/jcs.168674>
- 36 Tzima, E., Del Pozo, M. A., Kiosses, W. B., Mohamed, S. A., Li, S., Chien, S., & Schwartz, M.  
37 A. (2002). Activation of Rac1 by shear stress in endothelial cells mediates both

- 1 cytoskeletal reorganization and effects on gene expression. *The EMBO Journal*, 21(24),  
2 6791–6800. <https://doi.org/10.1093/emboj/cdf688>
- 3 van Buul, J. D., Allingham, M. J., Samson, T., Meller, J., Boulter, E., García-Mata, R., &  
4 Burridge, K. (2007). RhoG regulates endothelial apical cup assembly downstream from  
5 ICAM1 engagement and is involved in leukocyte trans-endothelial migration. *The*  
6 *Journal of Cell Biology*, 178(7), 1279–1293. <https://doi.org/10.1083/jcb.200612053>
- 7 van Buul, J. D., van Rijssel, J., van Alphen, F. P. J., Hoogenboezem, M., Tol, S., Hoeben, K.  
8 A., van Marle, J., Mul, E. P. J., & Hordijk, P. L. (2010). Inside-out regulation of ICAM-1  
9 dynamics in TNF-alpha-activated endothelium. *PloS One*, 5(6), e11336.  
10 <https://doi.org/10.1371/journal.pone.0011336>
- 11 Van Rijssel, J., Timmerman, I., Van Alphen, F. P. J., Hoogenboezem, M., Korchynskiy, O.,  
12 Geerts, D., Geissler, J., Reedquist, K. A., Niessen, H. W. M., & Van Buul, J. D. (2013).  
13 The Rho-GEF Trio regulates a novel pro-inflammatory pathway through the  
14 transcription factor Ets2. *Biology Open*, 2(6), 569–579.  
15 <https://doi.org/10.1242/bio.20134382>
- 16 Vestweber, D. (2015). How leukocytes cross the vascular endothelium. *Nature Reviews*.  
17 *Immunology*, 15(11), 692–704. <https://doi.org/10.1038/nri3908>
- 18 Wittchen, E. S. (2009). Endothelial signaling in paracellular and transcellular leukocyte  
19 transmigration. *Frontiers in Bioscience (Landmark Edition)*, 14, 2522–2545.  
20 <https://doi.org/10.2741/3395>
- 21 Wójciak-Stothard, B., Entwistle, A., Garg, R., & Ridley, A. J. (1998). Regulation of TNF-  
22 alpha-induced reorganization of the actin cytoskeleton and cell-cell junctions by Rho,  
23 Rac, and Cdc42 in human endothelial cells. *Journal of Cellular Physiology*, 176(1), 150–  
24 165. [https://doi.org/10.1002/\(SICI\)1097-4652\(199807\)176:1<150::AID-JCP17>3.0.CO;2-](https://doi.org/10.1002/(SICI)1097-4652(199807)176:1<150::AID-JCP17>3.0.CO;2-B)  
25 **B**
- 26 Wu, Y. I., Frey, D., Lungu, O. I., Jaehrig, A., Schlichting, I., Kuhlman, B., & Hahn, K. M.  
27 (2009). A genetically encoded photoactivatable Rac controls the motility of living cells.  
28 *Nature*, 461(7260), 104–108. <https://doi.org/10.1038/nature08241>
- 29 Yang, L., Froio, R. M., Sciuto, T. E., Dvorak, A. M., Alon, R., & Luscinskas, F. W. (2005).  
30 ICAM-1 regulates neutrophil adhesion and transcellular migration of TNF-alpha-  
31 activated vascular endothelium under flow. *Blood*, 106(2), 584–592.  
32 <https://doi.org/10.1182/blood-2004-12-4942>
- 33 Yuan, L., Chan, G. C., Beeler, D., Janes, L., Spokes, K. C., Dharaneeswaran, H., Mojiri, A.,  
34 Adams, W. J., Sciuto, T., Garcia-Cardena, G., Molema, G., Kang, P. M., Jahroudi, N.,  
35 Marsden, P. A., Dvorak, A., Regan, E. R., & Aird, W. C. (2016). A role of stochastic  
36 phenotype switching in generating mosaic endothelial cell heterogeneity. *Nature*  
37 *Communications*, 7, 10160. <https://doi.org/10.1038/ncomms10160>





Supplemental data file Arts et al

## **Supplemental data file**

**Arts et al.**

### **Contains:**

- **Supplemental figures**
- **Raw Data figure 1 and 3.**

Supplemental data file Arts et al

## Supplemental figure 1

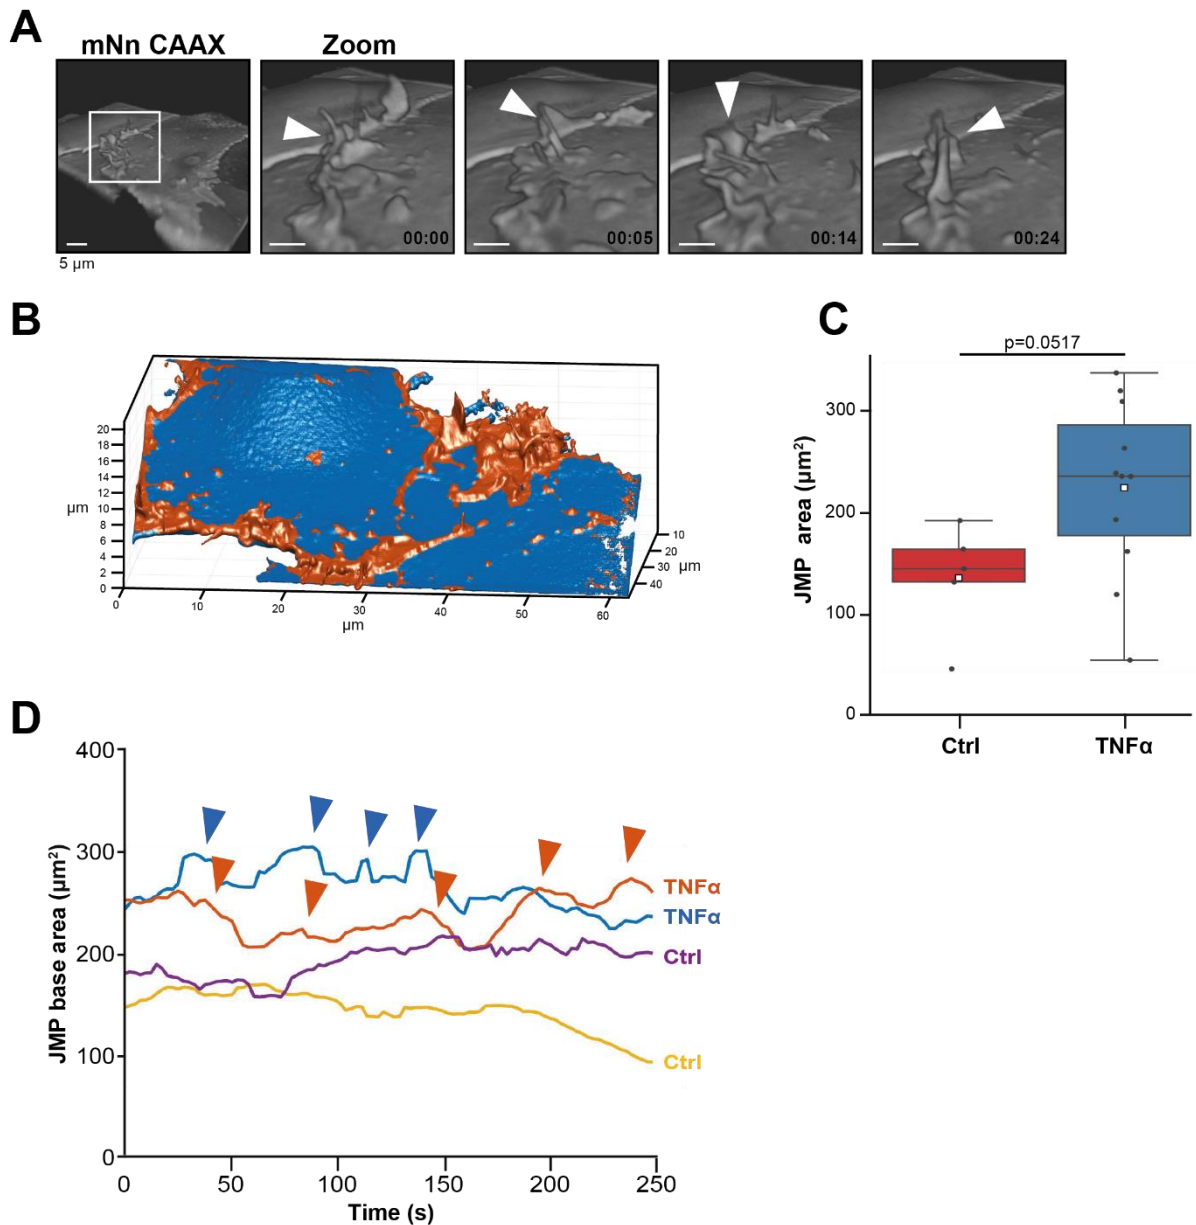

**Supplemental Figure 1. JMP dynamics.** (A) 3D view stills from mNeonGreen-CAAX-transfected HUVECs showing presence of junctional membrane protrusions, indicated by white arrowheads. Time indicated in seconds in lower right corner. Bar, 4 $\mu\text{m}$ . (B) Segmentation of JMPs (orange) identified from ECs (blue) used for the quantification of the LLSM images. Numbers in  $\mu\text{m}$ . (C) Boxplots of the JMP area average of 3D junctional membrane protrusions in time upon TNF- $\alpha$  treatment (blue) versus control (red). White square represents mean. Mann-Whitney U-test. (H) Quantification of the dynamics of JMP volume of control (yellow and purple lines) versus 20h TNF- $\alpha$ -treated (blue and orange lines) endothelial cells as indicated. 2 representative lines per condition are shown. JMPs from TNF $\alpha$ -treated ECs show more fluctuations in volume than JMPs from control cells as indicated by arrowheads.

Supplemental data file Arts et al

## Supplemental figure 2

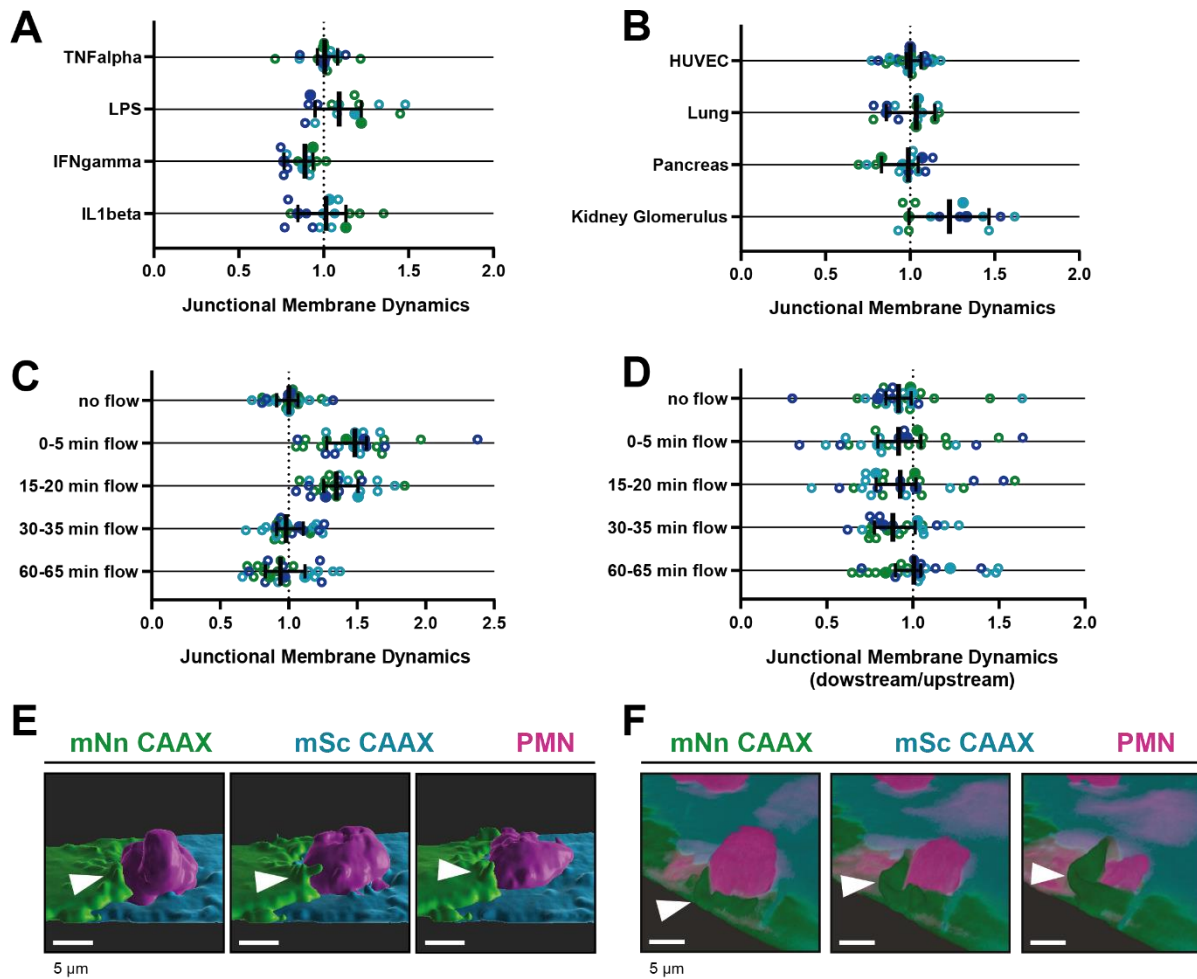

**Supplemental Figure 2.** Different stimuli promote *JMP dynamics* (**A-D**) Junctional membrane dynamics normalized to 20h TNF $\alpha$ -stimulated HUVECs cultured on glass without shear flow. Open dots are individual data points from 3 independent experiments, represented by 3 different colors. Filled dots are means from 3 experiments. Median with 95% CI is shown. Dotted line represents a ratio of 1, meaning no difference. **(A)** JMP dynamics are determined in human umbilical cord-derived, lung-derived, pancreas-derived and kidney glomerulus-derived endothelial cells. **(B)** JMP dynamics on HUVECs that were treated for 20h with inflammatory stimuli as indicated. **(C)** JMP dynamics on HUVECs that were exposed to flow for different periods of time as indicated. **(D)** Location of JMP dynamics on HUVECs on upstream or downstream side of flow direction for different periods of time as indicated. **(E)** 3D-image stills from mNeonGreen-CAAX- and mScarlet-I-CAAX-transfected HUVECs showing transmigrating neutrophil (magenta). 3D reconstruction using Imaris surface rendering function. Bar, 5 $\mu$ m. **(F)** 3D-image stills from mNeonGreen-CAAX- and mScarlet-I-CAAX-transfected HUVECs showing transmigrating neutrophil (magenta). 3D reconstruction using Imaris blend function. Bar, 5 $\mu$ m.

Supplemental data file Arts et al

## Supplemental figure 3

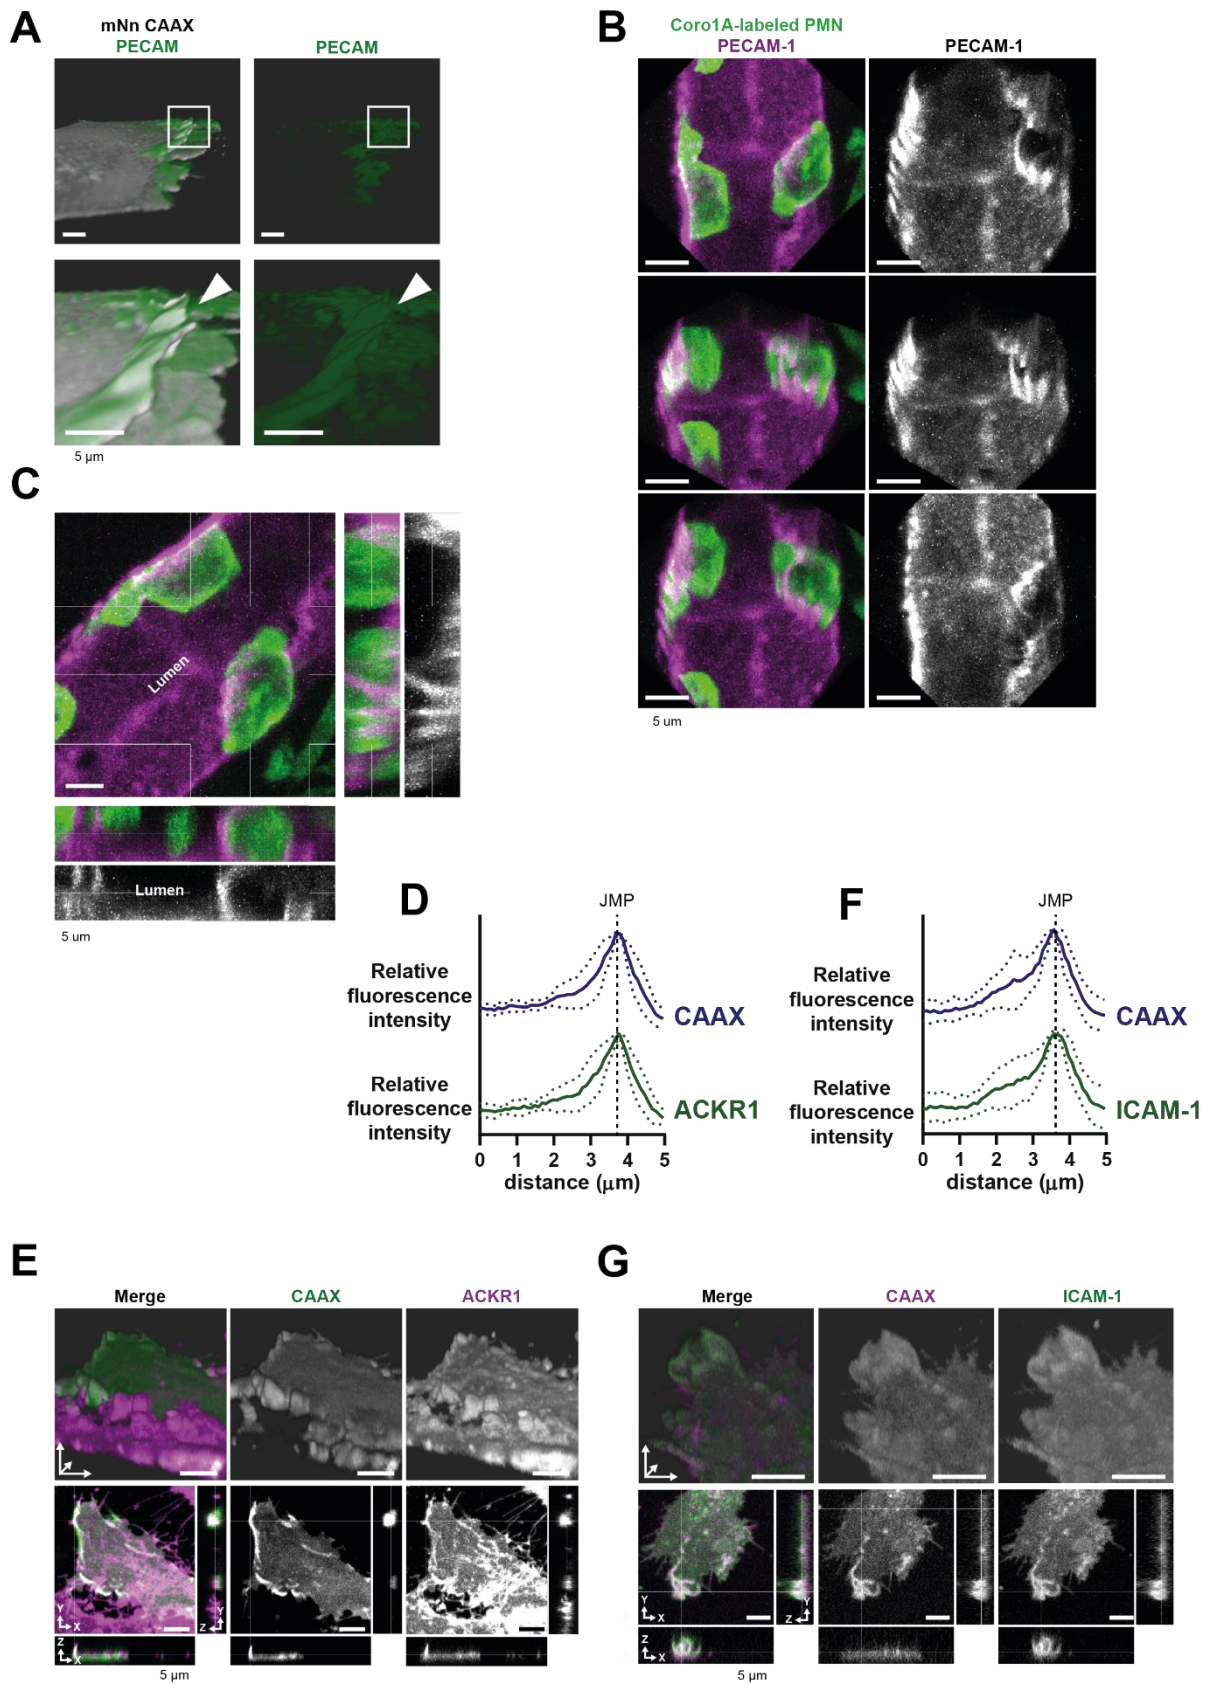

Supplemental data file Arts et al

**Supplemental Figure 3. JMPs *in vitro* and *in vivo*.** **(A)** Stills from HUVECs expressing mNeon Green-CAAX membrane label stained with a directly conjugated PECAM-1 antibody (green). 3D reconstruction LLSM using Imaris surface rendering function. White box indicates zoom region. Arrow shows PECAM-1 coverage on JMP. Bar, 5 $\mu$ m. **(B)** Confocal intravital microscopy of 20–80  $\mu$ m diameter cremasteric venules in mice (Coro1A-green neutrophils) immunostained *in vivo* for EC junctions by intrascrotal injections of fluorescent-labelled PECAM-1 (red) and stimulated for four hours with IL1 $\beta$  and TNF $\alpha$ . Fixed images show presence of PECAM-1-positive membrane protrusions in red that surround adherent neutrophils in green. Right image row shows PECAM-1 staining in white only. Scale bar, 5  $\mu$ m. **(C)** Confocal intravital microscopy as in B. Right image row shows PECAM-1 staining in white only. Scale bar, 5  $\mu$ m. **(D)** Quantification of fluorescence intensity by line scan analysis of ACKR1 (green) together with membrane marker CAAX (dark blue). **(E)** Stills from two endothelial cells expressing mScarlet-I-CAAX (green) and mNeonGreen-ACKR1 (magenta) showing ACKR1-containing JMPs as indicated by white arrowheads. Bar, 5 $\mu$ m. **(F)** Quantification of fluorescence intensity by line scan analysis of ICAM-1 (green) together with membrane marker CAAX (dark blue). **(G)** Stills from two endothelial cells expressing mScarlet-I-CAAX (green) and ICAM-1-GFP (magenta) showing ICAM-1-containing JMPs as indicated by white arrowheads. Bar, 5 $\mu$ m.

Supplemental data file Arts et al

## Supplemental figure 4

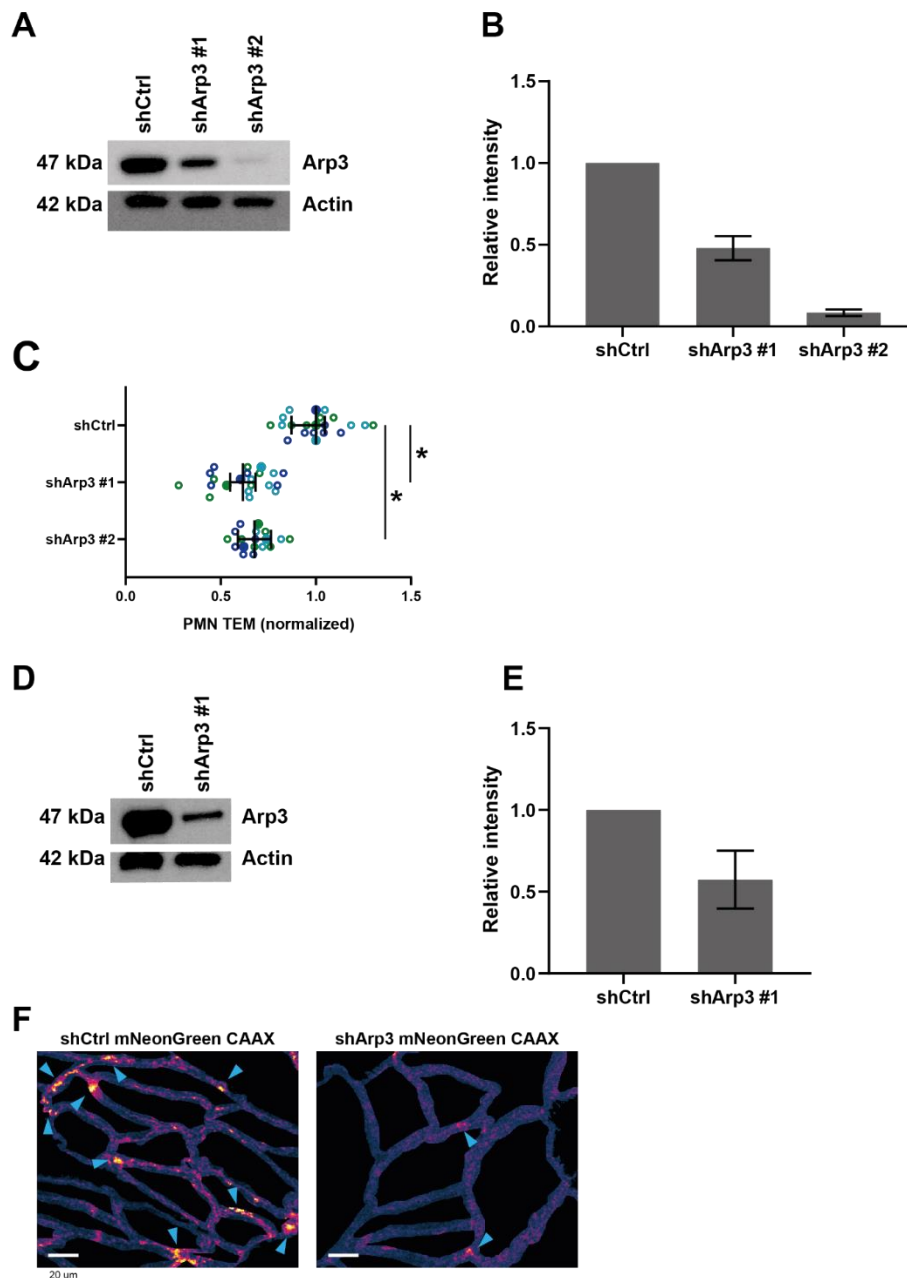

**Supplemental Figure 4. Arp3-mediated JMPs.** (A) Western blot analysis shows knockdown of Arp3 in EC with two independent shRNA constructs. Actin is shown as loading control. (B) Quantification of Western blot in A. (C) Arp3-knockdown (shArp3 #1 and #2) in ECs reduces neutrophil TEM. Silencing endothelial Arp3 reduced number of TEM events. Data is normalized to control, dashed line represents ratio of 1, meaning no difference. Open dots are individual data points from 3 independent experiments, represented by 3 different colors. Filled dots are means from 3 experiments. Median with 95% CI is shown. T-test: \* $p < 0.05$ . (D) Western blot analysis shows successful knockdown of Arp3 in ECs expressing CAAX. Actin is shown as loading control. (E) Quantification of Western blot in A. (F) JMP dynamics map of ECs that are treated as control or with shRNA Arp3 / mNeonGreen-CAAX. Warm colors indicate increased membrane dynamics, cold colors indicate low membrane dynamics. Blue arrowheads show sites of increased membrane dynamics. Bar, 20 $\mu$ m.

Supplemental data file Arts et al

## Supplemental figure 5

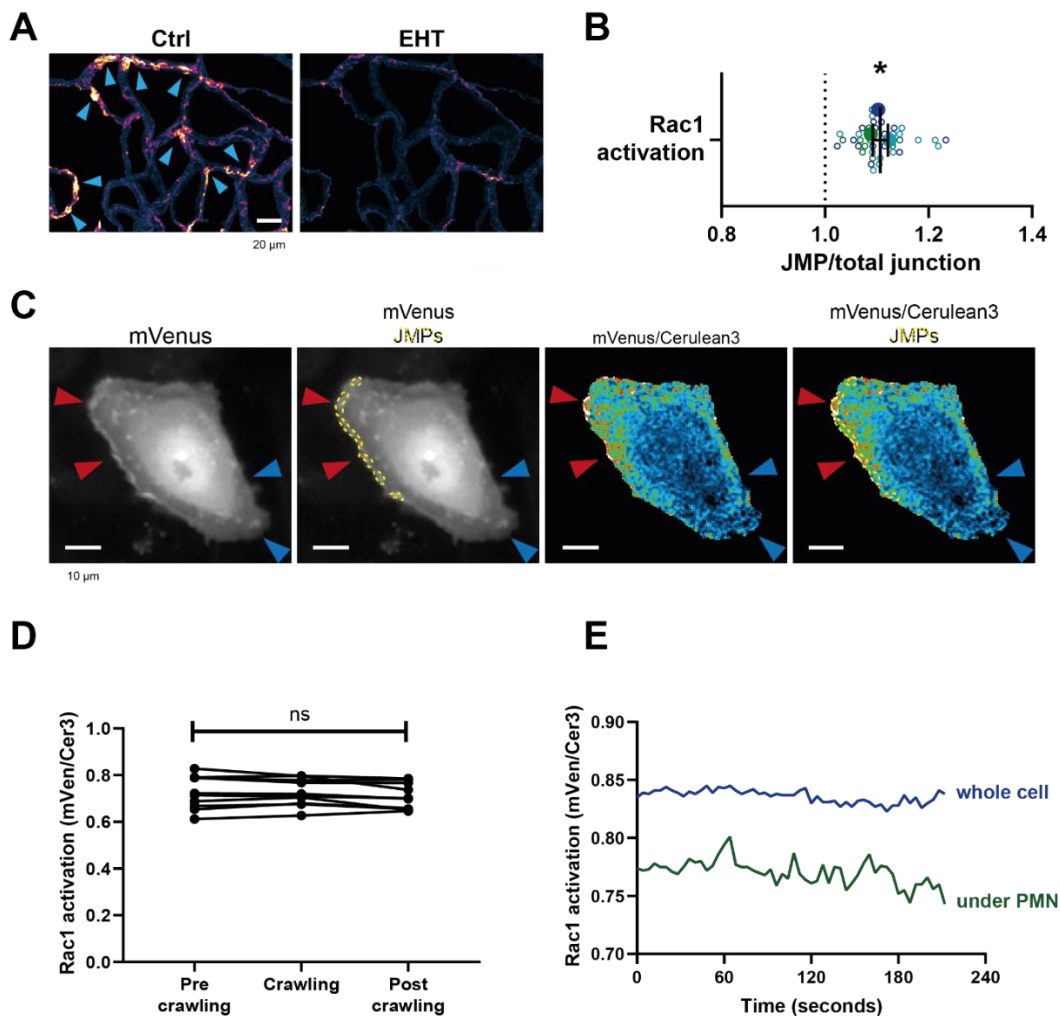

**Supplemental Figure 5.** *Endogenous Rac1 activation promotes asymmetric JMPs.* **(A)** Example images of membrane dynamics maps upon Rac1 inhibition EHT-1864 treatment. Warm colors indicate increased membrane dynamics, cold colors indicate low membrane dynamics. Blue arrowheads show sites of increased membrane dynamics. Bar, 20 $\mu$ m. **(B)** Quantification of FRET-based DORA Rac1 biosensor activation at JMPs versus 3  $\mu$ m wide junction regions as explained under C. Dotted line indicates ratio of 1, meaning no change. Open dots are individual data points from 3 independent experiments, represented by 3 different colors. Filled dots are means from 3 experiments. Median with 95% CI are shown. One-sample Wilcoxon test: \* $p$ <0.05. **(C)** Stills from Rac1 biosensor time lapse movie. mVenus (i), mVenus, JMPs indicated by yellow dotted lines (ii), Rac1 biosensor ratio image, warm colors indicate high Rac1 activation (iii), Rac1 biosensor ratio image, JMPs indicated by yellow dotted lines (iiii) Red arrowheads indicate regions of high Rac1 activation and JMPs, blue arrowheads indicate regions of low Rac1 activation and now JMPs. Bar, 10 $\mu$ m. **(D)** Quantification of FRET-based Rac1 biosensor activation under the area of crawling PMNs, and the region before and after the PMN has passed. Mann-Whitney U-test. **(E)** Graph showing example of EC measuring Rac1 activation of whole EC (blue line) and area of EC underneath a crawling neutrophil (green line). Diapedesis event occurs at the end of the lines at 210 seconds.



Supplemental data file Arts et al

## Supplemental figure 6

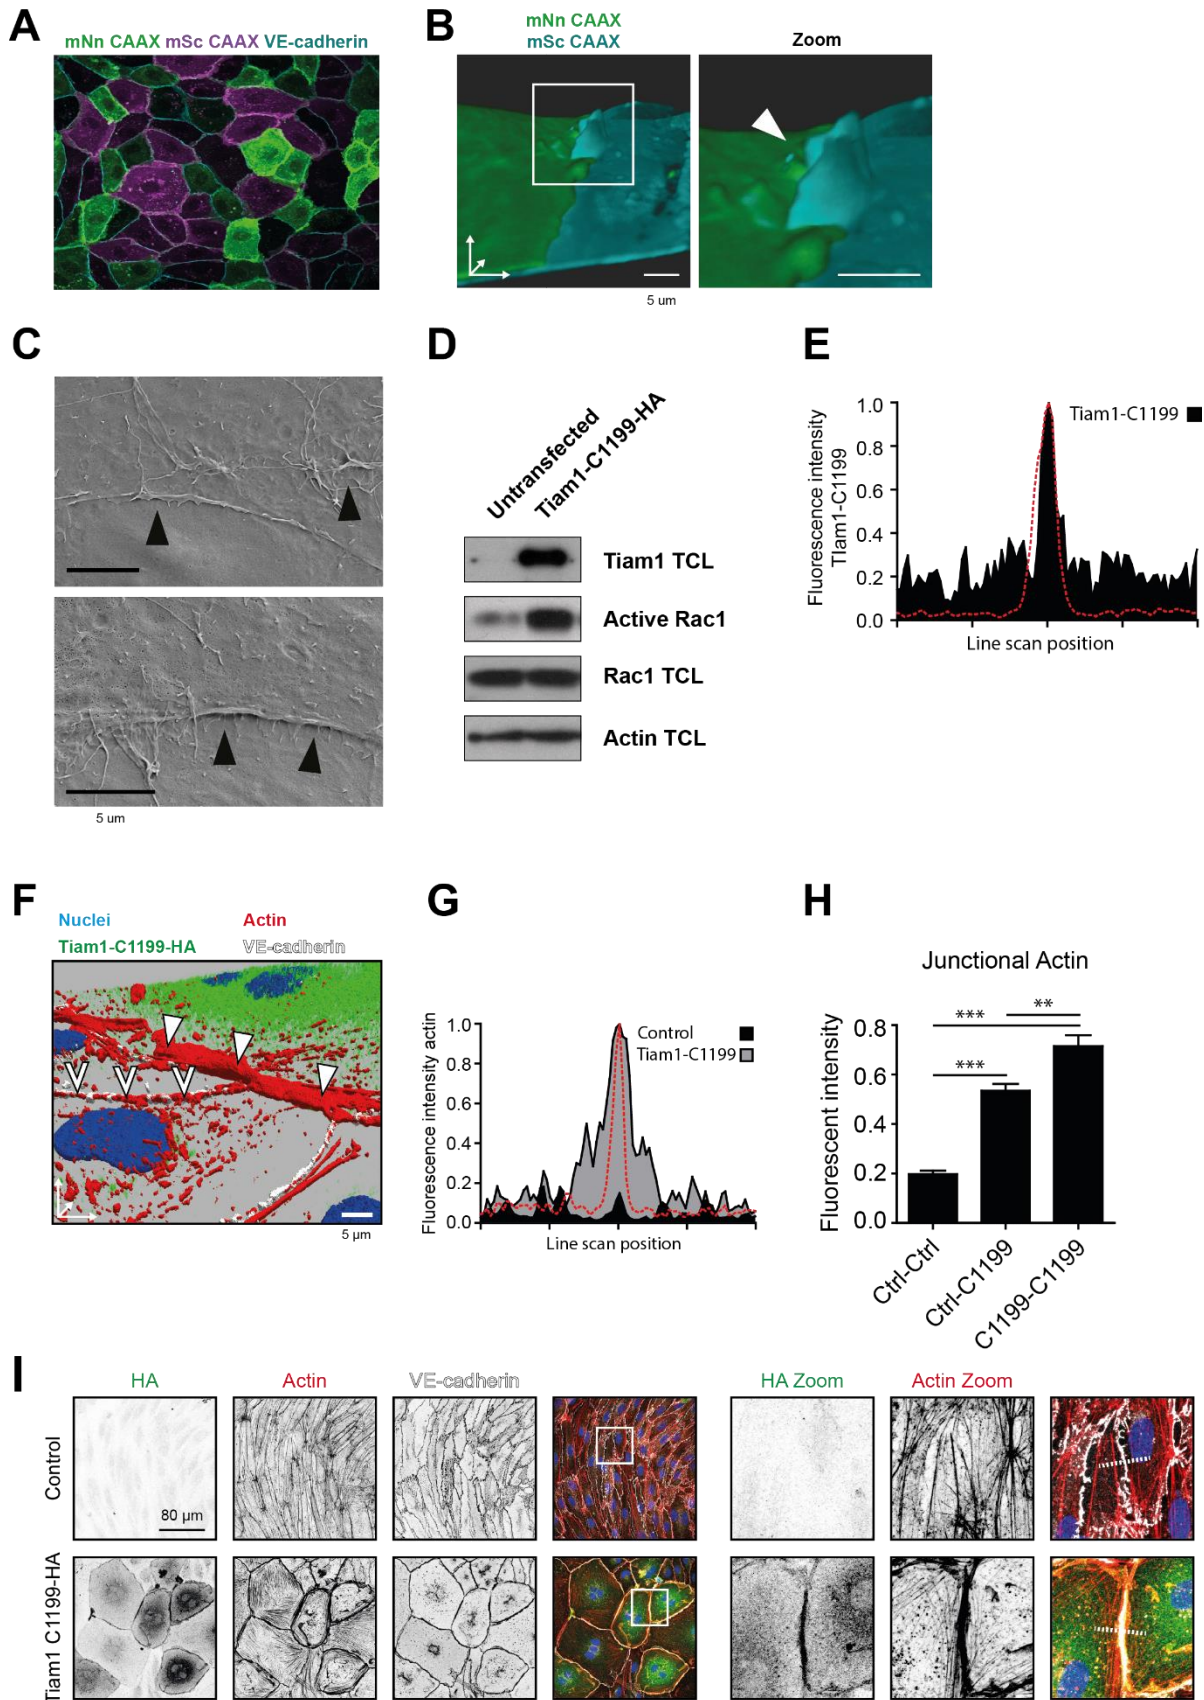

Supplemental data file Arts et al

**Supplemental Figure 6. JMPs and exogenous Rac1 activation. (A)** Mixed monolayer of ECs either expressing mNeonGreen-CAAX or mScarlet-I-CAAX **(B)** 3D image stills from two ECs showing the turquoise cell (right) being on top of the green cell (left). White box indicates zoom region. Arrowhead indicates asymmetric JMP. CAAX- and mScarlet-I-CAAX-transfected HUVECs showing transmigrating neutrophil (magenta). 3D reconstruction using Imaris surface rendering function Bar, 5 $\mu$ m. **(C)** Scanning electron microscopy image of asymmetric JMPs in two ECs. Black arrowheads show presence of membrane protrusions. Bar, 5 $\mu$ m. **(D)** Rac1 activity upon Tiam1-C1199-HA expression in ECs determined by biochemical Rac1 pulldown assay with biotin-tagged CRIB as bait. Western blot shows Tiam1 expression level, active and total Rac1 as indicated. Actin is shown as loading control. **(E)** Quantification of Tiam1-C1199-HA staining intensity in which the red dashed line indicates VE-cadherin staining that peaks at the cell-cell junction. Fluorescence intensity was quantified within 7.2  $\mu$ m from the VE-cadherin positive cell-cell junctions. **(F)** 3D projection of  $\alpha$ -nuclei (blue), Tiam1-C1199-HA (green), F-actin (red) and VE-cadherin (white) on the junction of a control and Tiam1-C1199-HA expressing EC showing the enrichment and protrusion towards the apical site of F-actin. **(G)** Quantification of junctional F-actin staining intensity in control cells (black) and Tiam1-C1199-HA cells (gray) in which the red dashed line indicates VE-cadherin staining and that peaks at the cell-cell junction. Fluorescence intensity was quantified within 7.2 $\mu$ m from the VE-cadherin positive cell-cell junctions. **(H)** Quantification of junctional F-actin at a control-control junction (Ctrl-Ctrl), an asymmetric junction of one control cell and one Tiam1-C1199 cell (Ctrl-C1199) and two Tiam1-C1199 cells (C1199-C1199). T-test:  $p < 0.05$  **(I)** Immunofluorescent staining for HA (green), F-actin (red) and VE-cadherin (white) on control ECs and Tiam1-C1199-transfected ECs. White box indicates area of zoom and images are a maximum intensity Z-projection. Scale bar, 80 $\mu$ m. White dashed line indicates site of line scan for measuring fluorescence intensity indicated in (H).

Supplemental data file Arts et al

## Supplemental figure 7

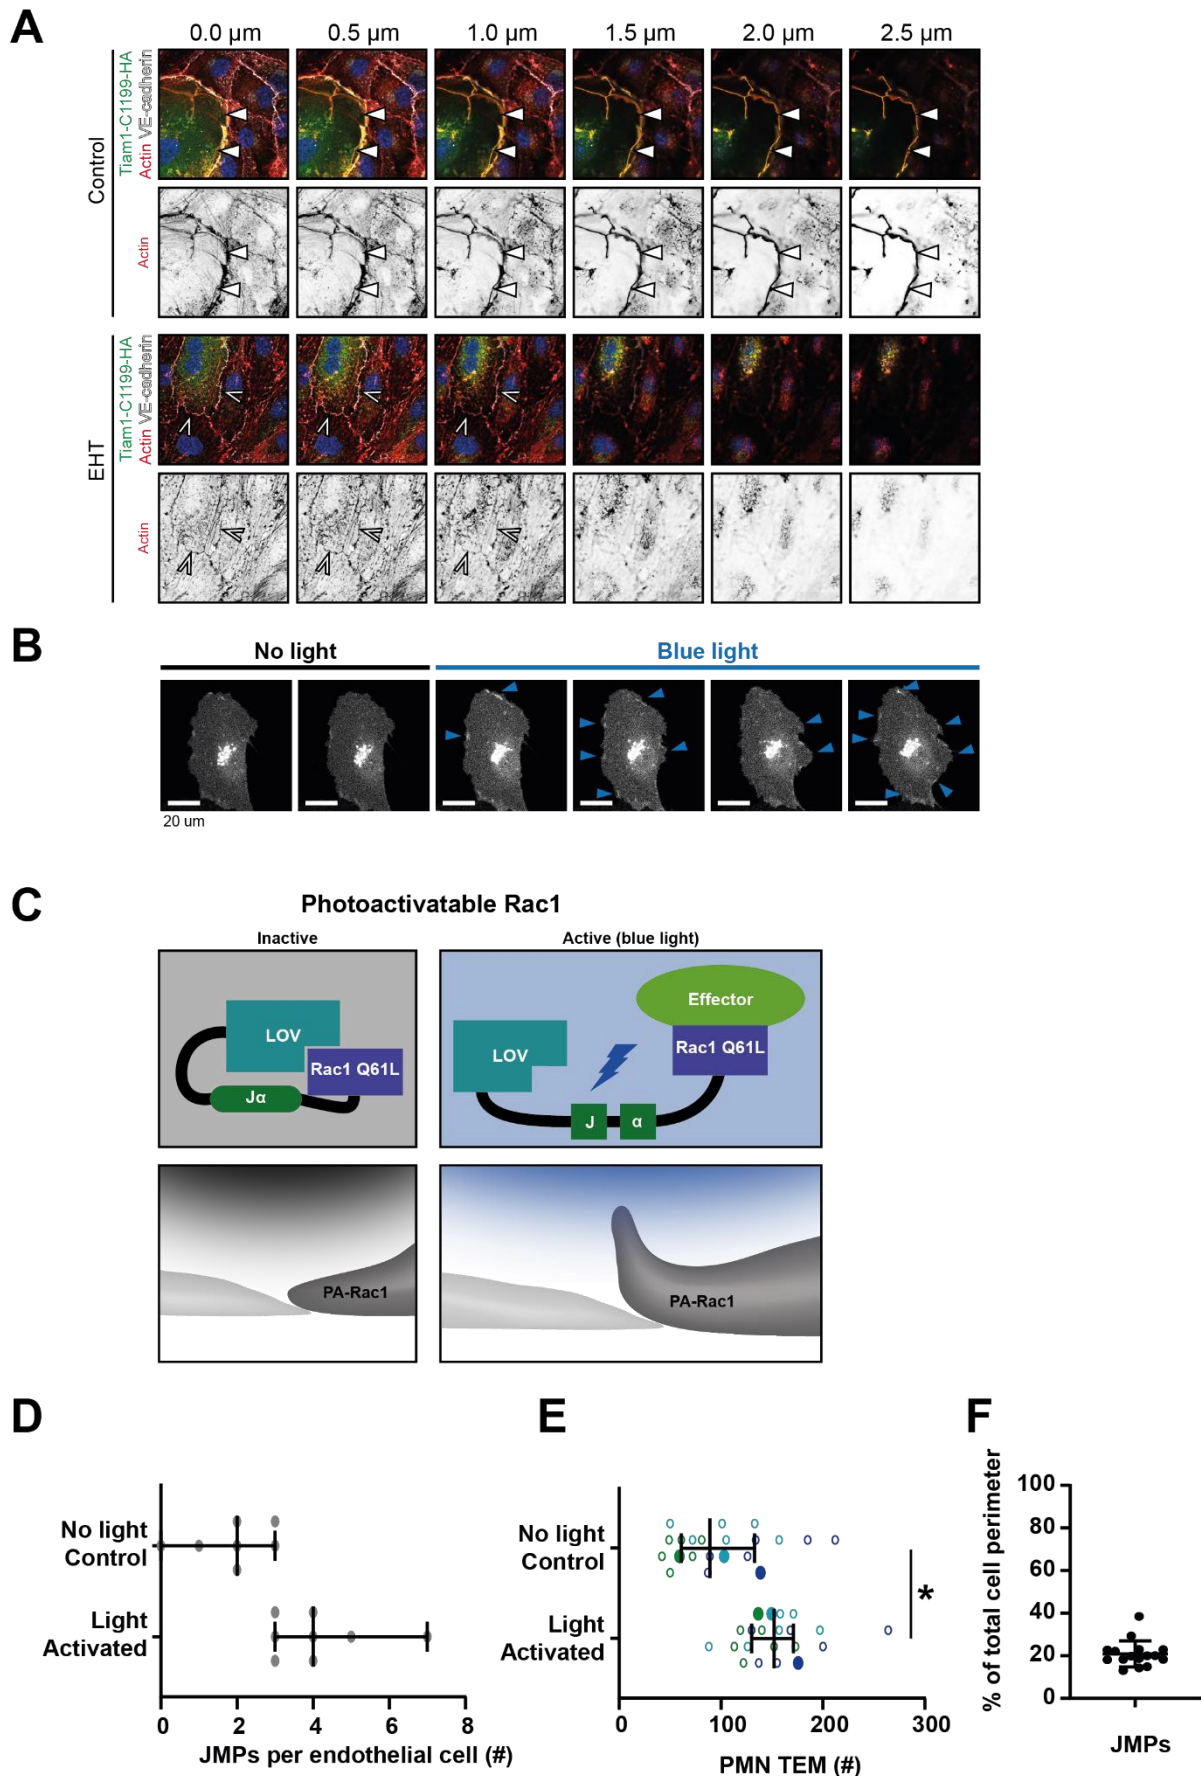

Supplemental data file Arts et al

**Supplemental Figure 7. JMPs and exogenous Rac1 activation.** **(A)** Immunofluorescent staining for Tiam1-C1199-HA (green), F-actin (red) and VE-cadherin (white) on HUVECs after overnight TNF $\alpha$  stimulation. Panel shows Z-stack from basal (0  $\mu$ m) towards apical (2.5  $\mu$ m) from left to right, respectively. Arrowheads indicate presence of F-actin-rich membrane ruffles in the different focal planes. Lower panel show cells treated with EHT-1864 **(B)** Stills from time lapse images of cells expressing PA-Rac1 illuminated with blue light (frame 3-6). **(C)** Schematic overview of the photo-reactive LOV2 (light-oxygen-voltage) domain sterically blocking Rac1 Q61L interactions until irradiation unwinds a helix ( $J\alpha$ ), linking LOV2 to Rac 1 Q61L. This probe can be reversibly and repeatedly activated using 458-473nm light to generate cell membrane protrusions and ruffling. **(D)** Quantification of the number of JMPs per endothelial cell expressing PA-Rac1, either illuminated with blue light to activate PA-Rac1, or not illuminated as a control. **(E)** Quantification of PMN TEM under flow in cells expressing PA-Rac1 either not illuminated (Ctrl) or blue-light illuminated (activated) HUVEC. Open dots are individual data points from 3 independent experiments, represented by 3 different colors. Filled dots are means from 3 experiments. Median with 95% CI is shown. T-Test: \* $p < 0.05$  **(F)** Percentage of the total junction that show JMP activity. Data are from at least 20 different junctions from 4 different experiments.

## Data for figure 1

### Arts et al.

#### Volume average over time

| <u>Treatment</u>                   | <u>N</u>        | <u>Median</u> |
|------------------------------------|-----------------|---------------|
| Control                            | 5               | 43,7741       |
| TNF 20h                            | 11              | 120,736       |
| <b><u>Mann-Whitney U-Test:</u></b> | <b>0,027473</b> |               |

Significant at 95% level

Not significant at 95% level

#### Volume standard deviation over time

| <u>Treatment</u>                   | <u>N</u>        | <u>Median</u> |
|------------------------------------|-----------------|---------------|
| Control                            | 5               | 12,8253       |
| TNF 20h                            | 11              | 18,4832       |
| <b><u>Mann-Whitney U-Test:</u></b> | <b>0,180403</b> |               |

#### Area average over time

| <u>Treatment</u>                   | <u>N</u>       | <u>Median</u> |
|------------------------------------|----------------|---------------|
| Control                            | 5              | 144,254       |
| TNF 20h                            | 11             | 236,273       |
| <b><u>Mann-Whitney U-Test:</u></b> | <b>0,05174</b> |               |

#### Area standard deviation over time

| <u>Treatment</u>                   | <u>N</u>        | <u>Median</u> |
|------------------------------------|-----------------|---------------|
| Control                            | 5               | 21,7989       |
| TNF 20h                            | 11              | 27,2546       |
| <b><u>Mann-Whitney U-Test:</u></b> | <b>0,221154</b> |               |

## Data for figure 3C

### Arts et al.

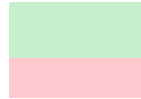

#### Normalized 50th percentile distance (averaged over time)

| <u>Stain</u>                       | <u>N</u>        | <u>Median</u> |
|------------------------------------|-----------------|---------------|
| PECAM                              | 8               | 0,140465      |
| VE-Cadherin                        | 5               | 0,09881       |
| <b><u>Mann-Whitney U-Test:</u></b> | <b>0,222222</b> |               |

Significant at 95% level

Not significant at 95% level

#### Normalized 75th percentile distance (averaged over time)

| <u>Stain</u>                       | <u>N</u>        | <u>Median</u> |
|------------------------------------|-----------------|---------------|
| PECAM                              | 8               | 0,316259      |
| VE-Cadherin                        | 5               | 0,184032      |
| <b><u>Mann-Whitney U-Test:</u></b> | <b>0,045066</b> |               |

#### Normalized 90th percentile distance (averaged over time)

| <u>Stain</u>                       | <u>N</u>        | <u>Median</u> |
|------------------------------------|-----------------|---------------|
| PECAM                              | 8               | 0,514478      |
| VE-Cadherin                        | 5               | 0,289167      |
| <b><u>Mann-Whitney U-Test:</u></b> | <b>0,018648</b> |               |
